# Supplementary material
Source: PubMed Central journal article supplement (PMC6497156)
Supplement: NIHMS1018413-supplement-1.pdf [file NIHMS1018413-supplement-1.pdf]

| Weaver et al., Table S1 |            |           |       |     |            |            |            |                          |                                          | Final Classification  |                  | segment 1 calls      |                  | segment 2 calls       |                                        | Segment 3                              |  | Final Classification |  |
|-------------------------|------------|-----------|-------|-----|------------|------------|------------|--------------------------|------------------------------------------|-----------------------|------------------|----------------------|------------------|-----------------------|----------------------------------------|----------------------------------------|--|----------------------|--|
| Expt/ch                 | DOB        | DD start  | Ear#  | sex | GT (Vgat)  | GT(Clock)  | GT(Npas2)  | GT unique                | Observer 1 / Observer 2 (if different)   | #1 / #2 if different  | tau (days 23-43) | #1 / #2 if different | tau (days 43-63) | #1 / #2 if different  | tau (days 63-83)                       | Observer 1 / Observer 2 (if different) |  |                      |  |
| V1-86                   | 9/15/2010  | 12/6/2010 | 5651  | m   | NoCre      | Clock(f/+) | Npas2(m/m) | control for CN-3opposite | Rhythmic                                 | Rhythmic              | 22.77            | Rhythmic             | 23.27            | Rhythmic              | 23.13                                  | Rhythmic                               |  |                      |  |
| V1-87                   | 9/15/2010  | 12/6/2010 | 5652  | m   | NoCre      | Clock(f/f) | Npas2(m/m) |                          | Rhythmic                                 | Rhythmic              | 24.02            | Rhythmic             | 23.98            | Rhythmic              | 24.03                                  | Rhythmic                               |  |                      |  |
| V1-88                   | 9/15/2010  | 12/6/2010 | 5655  | m   | Vgat-Cre + | Clock(f/+) | Npas2(m/m) | CN-3opposite             | Rhythmic                                 | Rhythmic              | 23.93            | Rhythmic             | 24.08            | Rhythmic              | 24.07                                  | Rhythmic                               |  |                      |  |
| V1-89                   | 9/15/2010  | 12/6/2010 | 5699  | m   | Vgat-Cre + | Clock(f/+) | Npas2(m/m) | CN-3opposite             | Rhythmic                                 | Rhythmic              | 23.37            | Rhythmic             | 23.58            | Rhythmic              | 23.63                                  | Rhythmic                               |  |                      |  |
| V1-90                   | 9/18/2010  | 12/6/2010 | 5671  | m   | NoCre      | Clock(f/f) | Npas2(m/m) | CN4                      | Rhythmic                                 | Rhythmic              | 23.53            | Rhythmic             | 23.6             | Rhythmic              | 23.57                                  | Rhythmic                               |  |                      |  |
| V1-91                   | 9/18/2010  | 12/6/2010 | 5672  | m   | NoCre      | Clock(f/f) | Npas2(m/m) | CN4                      | Rhythmic                                 | Rhythmic              | 22.98            | Rhythmic             | 23.35            | Rhythmic              | 23.28                                  | Rhythmic                               |  |                      |  |
| V1-92                   | 9/19/2010  | 12/6/2010 | 5679  | m   | NoCre      | Clock(f/f) | Npas2(m/m) | CN4                      | Rhythmic                                 | Rhythmic              | 24.18            | Rhythmic             | 24.27            | Rhythmic              | 24.25                                  | Rhythmic                               |  |                      |  |
| V1-94                   | 9/19/2010  | 12/6/2010 | 5682  | m   | Vgat-Cre + | Clock(f/+) | Npas2(m/m) | VCRE+; CN4               | Arrhythmic                               | arrhythmic            | N.A.             | Arrhythmic           | N.A.             | Arrhythmic            | N.A.                                   | Arrhythmic                             |  |                      |  |
| V1-95                   | 9/19/2010  | 12/6/2010 | 5683  | m   | Vgat-Cre + | Clock(f/+) | Npas2(m/m) | CN-3opposite             | Rhythmic                                 | Rhythmic              | 23.67            | Rhythmic             | 23.6             | Rhythmic              | 23.63                                  | Rhythmic                               |  |                      |  |
| V1-96                   | 9/21/2010  | 12/6/2010 | 5684  | m   | NoCre      | Clock(f/f) | Npas2(m/m) | CN4                      | Rhythmic                                 | Rhythmic              | 23.68            | Rhythmic             | 23.65            | Rhythmic              | 23.68                                  | Rhythmic                               |  |                      |  |
| V1-97                   | 9/21/2010  | 12/6/2010 | 5685  | m   | Vgat-Cre + | Clock(f/+) | Npas2(m/+) | CN-double-het            | Rhythmic                                 | Rhythmic              | 23.95            | Rhythmic             | 23.98            | Rhythmic              | 24.07                                  | Rhythmic                               |  |                      |  |
| V1-98                   | 9/21/2010  | 12/6/2010 | 5686  | m   | Vgat-Cre + | Clock(f/f) | Npas2(m/+) | CN3-allele               | Delayed arrhythmicity                    | Rhythmic / delayed AR | 23.92            | Arrhythmic           | 24.23            | Arrhythmic            | N.A.                                   | Delayed arrhythmicity                  |  |                      |  |
| V1-99                   | 9/21/2010  | 12/6/2010 | 5687  | m   | Vgat-Cre + | Clock(f/f) | Npas2(m/+) | CN3-allele               | Delayed arrhythmicity                    | Rhythmic              | 24.2             | Arrhythmic           | N.A.             | Arrhythmic            | N.A.                                   | Delayed arrhythmicity                  |  |                      |  |
| V1-100                  | 9/21/2010  | 12/6/2010 | 5688  | m   | Vgat-Cre + | Clock(f/+) | Npas2(m/m) | CN-3opposite             | Rhythmic                                 | Rhythmic              | 23.93            | Rhythmic             | 23.97            | Rhythmic              | 23.98                                  | Rhythmic                               |  |                      |  |
| V1-101                  | 9/21/2010  | 12/6/2010 | 5689  | m   | Vgat-Cre + | Clock(f/+) | Npas2(m/+) | CN-double-het            | Rhythmic                                 | Rhythmic              | 23.88            | Rhythmic             | 23.88            | Rhythmic              | 23.88                                  | Rhythmic                               |  |                      |  |
| V1-102                  | 9/15/2010  | 12/6/2010 | 5702  | f   | Vgat-Cre + | Clock(f/+) | Npas2(m/m) | CN-3opposite             | Rhythmic                                 | Rhythmic              | 23.45            | Rhythmic             | 23.02            | Rhythmic              | 22.9                                   | Rhythmic                               |  |                      |  |
| V1-103                  | 9/15/2010  | 12/6/2010 | 5703  | f   | Vgat-Cre + | Clock(f/f) | Npas2(m/m) | VCRE+; CN4               | Arrhythmic                               | arrhythmic            | N.A.             | Arrhythmic           | N.A.             | Arrhythmic            | N.A.                                   | Arrhythmic                             |  |                      |  |
| V2-64                   | 10/30/2010 | 1/25/2011 | 5929  | f   | Vgat-Cre + | Clock(f/+) | Npas2(m/+) | CN-double-het            | Rhythmic                                 | Rhythmic              | 23.98            | Rhythmic             | 24.03            | Rhythmic              | 23.98                                  | Rhythmic                               |  |                      |  |
| V2-66                   | 10/18/2010 | 1/25/2011 | 5862  | f   | Vgat-Cre + | Clock(f/+) | Npas2(m/m) | CN-3opposite             | Rhythmic                                 | Rhythmic              | 23.7             | Rhythmic             | 23.6             | Rhythmic              | 23.82                                  | Rhythmic                               |  |                      |  |
| V2-67                   | 10/18/2010 | 1/25/2011 | 5859  | f   | NoCre      | Clock(f/f) | Npas2(m/m) | CN4                      | Rhythmic                                 | Rhythmic              | 23.93            | Rhythmic             | 24.02            | Rhythmic              | 23.85                                  | Rhythmic                               |  |                      |  |
| V2-69                   | 10/30/2010 | 1/25/2011 | 5919  | f   | Vgat-Cre + | Clock(f/f) | Npas2(m/m) | VCRE+; CN4               | Arrhythmic                               | arrhythmic            | N.A.             | Arrhythmic           | N.A.             | Arrhythmic            | N.A.                                   | Arrhythmic                             |  |                      |  |
| V2-72                   | 10/30/2010 | 1/25/2011 | 5928  | f   | Vgat-Cre + | Clock(f/f) | Npas2(m/m) | VCRE+; CN4               | Arrhythmic                               | arrhythmic            | N.A.             | Arrhythmic           | N.A.             | Arrhythmic            | N.A.                                   | Arrhythmic                             |  |                      |  |
| V2-73                   | 10/30/2010 | 1/25/2011 | 5930  | f   | Vgat-Cre + | Clock(f/f) | Npas2(m/m) | VCRE+; CN4               | Arrhythmic                               | arrhythmic            | N.A.             | Arrhythmic           | N.A.             | Arrhythmic            | N.A.                                   | Arrhythmic                             |  |                      |  |
| V2-75                   | 10/9/2010  | 1/25/2011 | 5822  | f   | Vgat-Cre + | Clock(f/f) | Npas2(m/+) | CN3-allele               | Rhythmic                                 | Rhythmic              | 23.22            | Rhythmic             | 22.35            | Rhythmic              | 21.92                                  | Rhythmic                               |  |                      |  |
| V2-76                   | 10/9/2010  | 1/25/2011 | 5820  | f   | NoCre      | Clock(f/f) | Npas2(m/m) | CN4                      | Rhythmic                                 | Rhythmic              | 23.85            | Rhythmic             | 23.85            | Rhythmic              | 23.92                                  | Rhythmic                               |  |                      |  |
| V2-77                   | 10/24/2010 | 1/25/2011 | 5895  | f   | NoCre      | Clock(f/f) | Npas2(m/m) | CN4                      | Rhythmic                                 | Rhythmic              | 23.42            | Rhythmic             | 23.28            | Rhythmic              | 23.15                                  | Rhythmic                               |  |                      |  |
| V2-78                   | 10/9/2010  | 1/25/2011 | 5821  | f   | NoCre      | Clock(f/f) | Npas2(m/m) | control for CN3-allele   | Rhythmic                                 | Rhythmic              | 24.03            | Rhythmic             | 24.12            | Rhythmic              | 24.22                                  | Rhythmic                               |  |                      |  |
| V2-79                   | 11/5/2010  | 1/25/2011 | 5934  | f   | NoCre      | Clock(f/f) | Npas2(m/m) | CN4                      | Rhythmic                                 | Rhythmic              | 23.6             | Rhythmic             | 23.5             | Rhythmic              | 23.58                                  | Rhythmic                               |  |                      |  |
| V2-80                   | 10/30/2010 | 1/25/2011 | 5922  | m   | Vgat-Cre + | Clock(f/f) | Npas2(m/m) | VCRE+; CN4               | Arrhythmic                               | arrhythmic            | N.A.             | Arrhythmic           | N.A.             | No segment 3          | Arrhythmic                             |                                        |  |                      |  |
| V2-82                   | 10/30/2010 | 1/25/2011 | 5924  | m   | Vgat-Cre + | Clock(f/+) | Npas2(m/+) | CN-double-het            | Rhythmic                                 | Rhythmic              | 23.77            | Rhythmic             | 23.75            | Rhythmic              | 23.92                                  | Rhythmic                               |  |                      |  |
| V2-109                  | 10/30/2010 | 1/25/2011 | 5933  | m   | NoCre      | Clock(f/f) | Npas2(m/m) | CN4                      | Rhythmic                                 | Rhythmic              | 23.9             | Rhythmic             | 23.87            | Rhythmic              | 23.77                                  | Rhythmic                               |  |                      |  |
| V2-110                  | 10/24/2010 | 1/25/2011 | 5893  | m   | Vgat-Cre + | Clock(f/+) | Npas2(m/+) | CN-double-het            | Rhythmic                                 | Rhythmic              | 23.77            | Rhythmic             | 23.97            | Rhythmic              | 24.18                                  | Rhythmic                               |  |                      |  |
| V2-111                  | 10/24/2010 | 1/25/2011 | 5891  | m   | NoCre      | Clock(f/+) | Npas2(m/m) | control for CN3-opposite | Rhythmic                                 | Rhythmic              | 23.3             | Rhythmic             | 23.18            | No segment 3          | Rhythmic                               |                                        |  |                      |  |
| V2-112                  | 10/24/2010 | 1/25/2011 | 5894  | m   | Vgat-Cre + | Clock(f/+) | Npas2(m/m) | CN-3opposite             | Rhythmic                                 | Rhythmic              | 23.55            | Rhythmic             | 23.53            | Rhythmic              | 23.55                                  | Rhythmic                               |  |                      |  |
| V3-86                   | 11/26/2010 | 4/5/2011  | 5999  | m   | NoCre      | Clock(f/f) | Npas2(m/m) | CN4                      | Rhythmic                                 | Rhythmic              | 24.03            | Rhythmic             | 23.98            | No segment 3          | Rhythmic                               |                                        |  |                      |  |
| V3-87                   | 11/26/2010 | 4/5/2011  | 7026  | m   | NoCre      | Clock(f/f) | Npas2(m/m) | CN4                      | Rhythmic                                 | Rhythmic              | 24.25            | Rhythmic             | 24.3             | No segment 3          | Rhythmic                               |                                        |  |                      |  |
| V3-88                   | 11/26/2010 | 4/5/2011  | 7027  | m   | Vgat-Cre + | Clock(f/f) | Npas2(m/m) | VCRE+; CN4               | Arrhythmic                               | arrhythmic            | N.A.             | arrhythmic           | N.A.             | No segment 3          | Arrhythmic                             |                                        |  |                      |  |
| V3-89                   | 11/26/2010 | 4/5/2011  | 7028  | m   | Vgat-Cre + | Clock(f/f) | Npas2(m/m) | VCRE+; CN4               | Arrhythmic                               | arrhythmic            | N.A.             | arrhythmic           | N.A.             | No segment 3          | Arrhythmic                             |                                        |  |                      |  |
| V3-90                   | 11/26/2010 | 4/5/2011  | 7029  | m   | Vgat-Cre + | Clock(f/f) | Npas2(m/m) | VCRE+; CN4               | Arrhythmic                               | arrhythmic            | N.A.             | arrhythmic           | N.A.             | No segment 3          | Arrhythmic                             |                                        |  |                      |  |
| V3-91                   | 11/26/2010 | 4/5/2011  | 7030  | f   | NoCre      | Clock(f/f) | Npas2(m/m) | CN4                      | Rhythmic                                 | Rhythmic              | 23.58            | Rhythmic             | 23.45            | No segment 3          | Rhythmic                               |                                        |  |                      |  |
| V3-92                   | 11/26/2010 | 4/5/2011  | 7031  | f   | Vgat-Cre + | Clock(f/f) | Npas2(m/m) | VCRE+; CN4               | Arrhythmic                               | arrhythmic            | N.A.             | arrhythmic           | N.A.             | No segment 3          | Arrhythmic                             |                                        |  |                      |  |
| V3-93                   | 11/6/2011  | 4/5/2011  | 7199  | f   | NoCre      | Clock(f/f) | Npas2(m/m) | CN4                      | Rhythmic                                 | Rhythmic              | 23.9             | Rhythmic             | 23.85            | No segment 3          | Rhythmic                               |                                        |  |                      |  |
| V3-94                   | 11/6/2011  | 4/5/2011  | 7198  | m   | Vgat-Cre + | Clock(f/f) | Npas2(m/m) | VCRE+; CN4               | Arrhythmic                               | arrhythmic            | N.A.             | arrhythmic           | N.A.             | No segment 3          | Arrhythmic                             |                                        |  |                      |  |
| V4-36                   | 9/14/2010  | 4/14/2011 | 5634  | m   | Vgat-Cre + | Clock(f/f) | Npas2(m/m) | VCRE+; CN4               | Arrhythmic                               | arrhythmic            | N.A.             | No segment 2         | No segment 3     | No segment 3          | Arrhythmic                             |                                        |  |                      |  |
| V4-37                   | 12/20/2010 | 4/14/2011 | 7074  | f   | Vgat-Cre + | Clock(f/f) | Npas2(m/m) | VCRE+; CN4               | Arrhythmic                               | arrhythmic            | N.A.             | No segment 2         | No segment 3     | No segment 3          | Arrhythmic                             |                                        |  |                      |  |
| V4-38                   | 12/20/2010 | 4/14/2011 | 7076  | f   | Vgat-Cre + | Clock(f/f) | Npas2(m/m) | VCRE+; CN4               | Arrhythmic                               | arrhythmic            | N.A.             | No segment 2         | No segment 3     | No segment 3          | Arrhythmic                             |                                        |  |                      |  |
| V4-39                   | 12/20/2010 | 4/14/2011 | 7073  | f   | Vgat-Cre + | Clock(f/f) | Npas2(m/m) | VCRE+; CN4               | Rhythmic                                 | Rhythmic              | 25.63            | No segment 2         | No segment 3     | No segment 3          | Rhythmic                               |                                        |  |                      |  |
| V4-43                   | 12/20/2010 | 4/14/2011 | 7075  | f   | Vgat-Cre + | Clock(f/f) | Npas2(m/m) | VCRE+; CN4               | Arrhythmic                               | arrhythmic            | N.A.             | No segment 2         | No segment 3     | No segment 3          | Arrhythmic                             |                                        |  |                      |  |
| V4-54                   | 1/18/2011  | 4/14/2011 | 7212  | f   | NoCre      | Clock(f/f) | Npas2(m/m) | CN4                      | Rhythmic                                 | Rhythmic              | 23.78            | No segment 2         | No segment 3     | No segment 3          | Rhythmic                               |                                        |  |                      |  |
| V4-55                   | 1/18/2011  | 4/14/2011 | 7211  | f   | NoCre      | Clock(f/f) | Npas2(m/m) | CN4                      | Rhythmic                                 | Rhythmic              | 23.9             | No segment 2         | No segment 3     | No segment 3          | Rhythmic                               |                                        |  |                      |  |
| V5-64                   | 5/21/2011  | 9/2/2011  | 7639  | m   | NoCre      | Clock(f/f) | Npas2(m/m) | CN4                      | Rhythmic                                 | Rhythmic              | 23.7             | Rhythmic             | 23.73            | No segment 3          | Rhythmic                               |                                        |  |                      |  |
| V5-65                   | 4/29/2011  | 9/2/2011  | 7567  | m   | Vgat-Cre + | Clock(f/f) | Npas2(m/m) | VCRE+; CN4               | Arrhythmic                               | arrhythmic            | N.A.             | arrhythmic           | N.A.             | No segment 3          | Arrhythmic                             |                                        |  |                      |  |
| V5-66                   | 6/23/2011  | 9/2/2011  | 7724  | m   | Vgat-Cre + | Clock(f/f) | Npas2 (WT) | VC                       | Delayed arrhythmicity                    | Rhythmic              | 24.9 (exclude)   | arrhythmic           | N.A.             | Delayed arrhythmicity | Delayed arrhythmicity                  |                                        |  |                      |  |
| V5-69                   | 6/23/2011  | 9/2/2011  | 7727a | f   | Vgat-Cre + | Clock(f/f) | Npas2 (WT) | VC                       | Rhythmic                                 | Rhythmic              | 23.23            | Rhythmic             | 23.37            | No segment 3          | Rhythmic                               |                                        |  |                      |  |
| V5-71                   | 6/23/2011  | 9/2/2011  | 7727b | f   | Vgat-Cre + | Clock(f/f) | Npas2 (WT) | VC                       | Rhythmic                                 | Rhythmic              | 23.95            | Rhythmic             | 23.97            | No segment 3          | Rhythmic                               |                                        |  |                      |  |
| V5-73                   | 4/29/2011  | 9/2/2011  | 7569  | f   | NoCre      | Clock(f/f) | Npas2(m/m) | CN4                      | Rhythmic                                 | Rhythmic              | 23.87            | Rhythmic             | 23.5             | No segment 3          | Rhythmic                               |                                        |  |                      |  |
| V5-74                   | 4/29/2011  | 9/2/2011  | 7570a | f   | Vgat-Cre + | Clock(f/f) | Npas2(m/m) | VCRE+; CN4               | Arrhythmic                               | arrhythmic            | N.A.             | arrhythmic           | N.A.             | No segment 3          | Arrhythmic                             |                                        |  |                      |  |
| V5-75                   | 5/21/2011  | 9/2/2011  | 7643  | f   | Vgat-Cre + | Clock(f/f) | Npas2(m/m) | VCRE+; CN4               | Delayed arrhythmicity / Arrhythmic       | arrhythmic/arrhythmic | 24.23            | arrhythmic           | N.A.             | No segment 3          | Delayed arrhythmicity / Arrhythmic     |                                        |  |                      |  |
| V5-76                   | 5/21/2011  | 9/2/2011  | 7642  | f   | Vgat-Cre + | Clock(f/f) | Npas2(m/m) | VCRE+; CN4               | Arrhythmic                               | arrhythmic            | N.A.             | arrhythmic           | N.A.             | No segment 3          | Arrhythmic                             |                                        |  |                      |  |
| V5-77                   | 5/21/2011  | 9/2/2011  | 7641  | f   | NoCre      | Clock(f/f) | Npas2(m/m) | CN4                      | Rhythmic                                 | Rhythmic              | 23.98            | Rhythmic             | 23.98            | No segment 3          | Rhythmic                               |                                        |  |                      |  |
| V5-78                   | 5/21/2011  | 9/2/2011  | 7640  | f   | NoCre      | Clock(f/f) | Npas2(m/m) | CN4                      | Rhythmic                                 | Rhythmic              | 23.38            | Rhythmic             | 23.63            | No segment 3          | Rhythmic                               |                                        |  |                      |  |
| V5-79                   | 4/29/2011  | 9/2/2011  | 7570b | f   | NoCre      | Clock(f/f) | Npas2(m/m) | CN4                      | Rhythmic                                 | Rhythmic              | 24.07            | Rhythmic             | 23.98            | No segment 3          | Rhythmic                               |                                        |  |                      |  |
| V5-109                  | 9/1/2010   | 9/2/2011  | 5588  | m   | NoCre      | Clock(f/f) | Npas2 (WT) | control for VC           | Rhythmic                                 | Rhythmic              | 24.03            | Rhythmic             | 23.9             | No segment 3          | Rhythmic                               |                                        |  |                      |  |
| V5-110                  | 4/29/2011  | 9/2/2011  | 7568  | m   | Vgat-Cre + | Clock(f/f) | Npas2(m/m) | VCRE+; CN4               | Arrhythmic                               | arrhythmic            | N.A.             | arrhythmic           | N.A.             | No segment 3          | Arrhythmic                             |                                        |  |                      |  |
| V5-111                  | 4/29/2011  | 9/2/2011  | 7565  | m   | NoCre      | Clock(f/f) | Npas2(m/m) | CN4                      | Rhythmic                                 | Rhythmic              | 22.67            | Rhythmic             | 22.75            | No segment 3          | Rhythmic                               |                                        |  |                      |  |
| V5-112                  | 4/29/2011  | 9/2/2011  | 7566  | m   | NoCre      | Clock(f/f) | Npas2(m/m) | CN4                      | Rhythmic                                 | Rhythmic              | 23.17            | Rhythmic             | 22.93            | No segment 3          | Rhythmic                               |                                        |  |                      |  |
| V6-008                  | 7/19/2011  | 1/23/2012 | 7889  | m   | Vgat-Cre + | Clock (WT) | Npas2 (WT) | VCRE+                    | Rhythmic in seg 1 & through Light Pulses | Rhythmic              | 23.98            | light pulses         | light pulses     | light pulses          | Rhythmic seg 1 & thru LPs, normal      |                                        |  |                      |  |
| V6-009                  | 7/19/2011  | 1/23/2012 | 7888  | m   | Vgat-Cre + | Clock (WT) | Npas2 (WT) | VCRE+                    | Rhythmic in seg 1 & through Light Pulses | Rhythmic              | 23.97            | light pulses         | light pulses     | light pulses          | Rhythmic seg 1 & thru LPs, normal      |                                        |  |                      |  |
| V6-011                  | 8/27/2011  | 1/23/2012 | 8013  | m   | Vgat-Cre + | Clock (WT) | Npas2 (WT) | VCRE+                    | Rhythmic in seg 1 & through Light Pulses | Rhythmic              | 23.73            | light pulses         | light pulses     | light pulses          | Rhythmic seg 1 & thru LPs, normal      |                                        |  |                      |  |
| V6-087                  | 4/5/2011   | 1/23/2012 | 7451  | f   | Vgat-Cre + | Clock(f/f) | Npas2(m/+) | CN3-allele               | Rhythmic in seg 1, weird in LP segment   | Rhythmic              | 24.3             | light pulses         | light pulses     | light pulses          | Rhythmic in seg 1, weird in LP segment |                                        |  |                      |  |
| V6-088                  | 7/26/2011  | 1/23/2012 | 7909  | f   | NoCre      | Clock(f/f) | Npas2(m/+) | control for CN3-allele   | Rhythmic in seg 1 & through Light Pulses | Rhythmic              | 23.95            | light pulses         | light pulses     | light pulses          | Rhythmic seg 1 & thru LPs, normal      |                                        |  |                      |  |



1  
2  
3  
4  
5  
6  
7  
8  
9  
10  
11  
12  
13  
14  
15  
16  
17  
18  
19  
20  
21  
22  
23  
24  
25  
26  
27  
28  
29  
30  
31  
32  
33  
34  
35  
36  
37  
38  
39  
40  
41  
42  
43  
44  
45  
46  
47

| Weaver et al., Table S2 |            |           |       |     |             |              |            |                        |                                            |                       |               |                       |               |              |           |
|-------------------------|------------|-----------|-------|-----|-------------|--------------|------------|------------------------|--------------------------------------------|-----------------------|---------------|-----------------------|---------------|--------------|-----------|
| Expt/ch                 | DOB        | DD start  | ear#  | sex | GT(VgatCre) | GT           | GT         | unique comb GT         | Final Classification                       | segment 1 calls       | segment 1 tau | segment 2 calls       | segment 2 tau | Segment 3    | Segment 3 |
| V1-94                   | 9/19/2010  | 12/6/2010 | 5682  | m   | Vgat-Cre+   | Clock(fl/fl) | Npas2(m/m) | VCRE+; CN4             | 1 Arrhythmic                               | arrhythmic            | N.A.          | Arrhythmic            | N.A.          | Arrhythmic   | N.A.      |
| V1-103                  | 9/15/2010  | 12/6/2010 | 5703  | f   | Vgat-Cre+   | Clock(fl/fl) | Npas2(m/m) | VCRE+; CN4             | 1 Arrhythmic                               | arrhythmic            | N.A.          | Arrhythmic            | N.A.          | Arrhythmic   | N.A.      |
| V2-69                   | 10/30/2010 | 1/25/2011 | 5919  | f   | Vgat-Cre+   | Clock(fl/fl) | Npas2(m/m) | VCRE+; CN4             | 1 Arrhythmic                               | arrhythmic            | N.A.          | Arrhythmic            | N.A.          | Arrhythmic   | N.A.      |
| V2-72                   | 10/30/2010 | 1/25/2011 | 5928  | f   | Vgat-Cre+   | Clock(fl/fl) | Npas2(m/m) | VCRE+; CN4             | 1 Arrhythmic                               | arrhythmic            | N.A.          | Arrhythmic            | N.A.          | Arrhythmic   | N.A.      |
| V2-73                   | 10/30/2010 | 1/25/2011 | 5930  | f   | Vgat-Cre+   | Clock(fl/fl) | Npas2(m/m) | VCRE+; CN4             | 1 Arrhythmic                               | arrhythmic            | N.A.          | Arrhythmic            | N.A.          | Arrhythmic   | N.A.      |
| V2-80                   | 10/30/2010 | 1/25/2011 | 5922  | m   | Vgat-Cre+   | Clock(fl/fl) | Npas2(m/m) | VCRE+; CN4             | 1 Arrhythmic                               | arrhythmic            | N.A.          | Arrhythmic            | N.A.          | No segment 3 |           |
| V3-88                   | 11/26/2010 | 4/5/2011  | 7027  | m   | Vgat-Cre+   | Clock(fl/fl) | Npas2(m/m) | VCRE+; CN4             | 1 Arrhythmic                               | arrhythmic            | N.A.          | Arrhythmic            | N.A.          | No segment 3 |           |
| V3-89                   | 11/26/2010 | 4/5/2011  | 7028  | m   | Vgat-Cre+   | Clock(fl/fl) | Npas2(m/m) | VCRE+; CN4             | 1 Arrhythmic                               | arrhythmic            | N.A.          | Arrhythmic            | N.A.          | No segment 3 |           |
| V3-90                   | 11/26/2010 | 4/5/2011  | 7029  | m   | Vgat-Cre+   | Clock(fl/fl) | Npas2(m/m) | VCRE+; CN4             | 1 Arrhythmic                               | arrhythmic            | N.A.          | Arrhythmic            | N.A.          | No segment 3 |           |
| V3-92                   | 11/26/2010 | 4/5/2011  | 7031  | f   | Vgat-Cre+   | Clock(fl/fl) | Npas2(m/m) | VCRE+; CN4             | 1 Arrhythmic                               | arrhythmic            | N.A.          | Arrhythmic            | N.A.          | No segment 3 |           |
| V3-94                   | 1/16/2011  | 4/5/2011  | 7198  | m   | Vgat-Cre+   | Clock(fl/fl) | Npas2(m/m) | VCRE+; CN4             | 1 Arrhythmic                               | arrhythmic            | N.A.          | Arrhythmic            | N.A.          | No segment 3 |           |
| V4-36                   | 9/14/2010  | 4/14/2011 | 5634  | m   | Vgat-Cre+   | Clock(fl/fl) | Npas2(m/m) | VCRE+; CN4             | 1 Arrhythmic                               | arrhythmic            | N.A.          | No segment 2          |               | No segment 3 |           |
| V4-37                   | 12/20/2010 | 4/14/2011 | 7074  | f   | Vgat-Cre+   | Clock(fl/fl) | Npas2(m/m) | VCRE+; CN4             | 1 Arrhythmic                               | arrhythmic            | N.A.          | No segment 2          |               | No segment 3 |           |
| V4-38                   | 12/20/2010 | 4/14/2011 | 7076  | f   | Vgat-Cre+   | Clock(fl/fl) | Npas2(m/m) | VCRE+; CN4             | 1 Arrhythmic                               | arrhythmic            | N.A.          | No segment 2          |               | No segment 3 |           |
| V4-39                   | 12/20/2010 | 4/14/2011 | 7073  | f   | Vgat-Cre+   | Clock(fl/fl) | Npas2(m/m) | VCRE+; CN4             | 1 Rhythmic                                 | Rhythmic              | 25.63         | No segment 2          |               | No segment 3 |           |
| V4-43                   | 12/20/2010 | 4/14/2011 | 7075  | f   | Vgat-Cre+   | Clock(fl/fl) | Npas2(m/m) | VCRE+; CN4             | 1 Arrhythmic                               | arrhythmic            | N.A.          | No segment 2          |               | No segment 3 |           |
| V5-65                   | 4/29/2011  | 9/2/2011  | 7567  | m   | Vgat-Cre+   | Clock(fl/fl) | Npas2(m/m) | VCRE+; CN4             | 1 Arrhythmic                               | arrhythmic            | N.A.          | arrhythmic            | N.A.          | No segment 3 |           |
| V5-74                   | 4/29/2011  | 9/2/2011  | 7570a | f   | Vgat-Cre+   | Clock(fl/fl) | Npas2(m/m) | VCRE+; CN4             | 1 Arrhythmic                               | arrhythmic            | N.A.          | arrhythmic            | N.A.          | No segment 3 |           |
| V5-75                   | 5/21/2011  | 9/2/2011  | 7643  | f   | Vgat-Cre+   | Clock(fl/fl) | Npas2(m/m) | VCRE+; CN4             | 1 Delayed arrhythmicity / Arrhythmic       | Rhythmic / arrhythmic | 24.23         | arrhythmic            | N.A.          | No segment 3 |           |
| V5-76                   | 5/21/2011  | 9/2/2011  | 7642  | f   | Vgat-Cre+   | Clock(fl/fl) | Npas2(m/m) | VCRE+; CN4             | 1 Arrhythmic                               | arrhythmic            | N.A.          | arrhythmic            | N.A.          | No segment 3 |           |
| V5-110                  | 4/29/2011  | 9/2/2011  | 7568  | m   | Vgat-Cre+   | Clock(fl/fl) | Npas2(m/m) | VCRE+; CN4             | 1 Arrhythmic                               | arrhythmic            | N.A.          | arrhythmic            | N.A.          | No segment 3 |           |
| V7-30                   | 12/24/2011 | 6/23/2012 | 8157  | f   | Vgat-Cre+   | Clock(fl/fl) | Npas2(m/m) | VCRE+; CN4             | 1 Arrhythmic                               | arrhythmic            | N.A.          | arrhythmic            | N.A.          | arrhythmic   |           |
| V7-31                   | 12/24/2011 | 6/23/2012 | 8158  | f   | Vgat-Cre+   | Clock(fl/fl) | Npas2(m/m) | VCRE+; CN4             | 1 Arrhythmic                               | arrhythmic            | N.A.          | arrhythmic            | N.A.          | no data      |           |
| V9-086                  | 7/21/2014  | #####     | 3178  | m   | Vgat-Cre+   | Clock(fl/fl) | Npas2(m/m) | VCRE+; CN4             | 1 Arrhythmic                               | arrhythmic            | N.A.          | arrhythmic            | N.A.          | arrhythmic   | N.A.      |
| V9-087                  | 7/21/2014  | #####     | 3179  | m   | Vgat-Cre+   | Clock(fl/fl) | Npas2(m/m) | VCRE+; CN4             | 1 Arrhythmic                               | arrhythmic            | N.A.          | arrhythmic            | N.A.          | arrhythmic   | N.A.      |
| V9-089                  | 7/22/2014  | #####     | 3213  | m   | Vgat-Cre+   | Clock(fl/fl) | Npas2(m/m) | VCRE+; CN4             | 1 Arrhythmic                               | arrhythmic            | N.A.          | arrhythmic            | N.A.          | arrhythmic   | N.A.      |
| V9-090                  | 4/3/2014   | #####     | 2245  | f   | Vgat-Cre+   | Clock(fl/fl) | Npas2(m/m) | VCRE+; CN4             | 1 Arrhythmic                               | arrhythmic            | N.A.          | arrhythmic            | N.A.          | arrhythmic   | N.A.      |
| V1-87                   | 9/15/2010  | 12/6/2010 | 5652  | m   | NoCre       | Clock(fl/fl) | Npas2(m/m) | CN4                    | 2 Rhythmic                                 | Rhythmic              | 24.02         | Rhythmic              | 23.98         | Rhythmic     | 24.03     |
| V1-90                   | 9/18/2010  | 12/6/2010 | 5671  | m   | NoCre       | Clock(fl/fl) | Npas2(m/m) | CN4                    | 2 Rhythmic                                 | Rhythmic              | 23.53         | Rhythmic              | 23.6          | Rhythmic     | 23.57     |
| V1-91                   | 9/18/2010  | 12/6/2010 | 5672  | m   | NoCre       | Clock(fl/fl) | Npas2(m/m) | CN4                    | 2 Rhythmic                                 | Rhythmic              | 22.98         | Rhythmic              | 23.35         | Rhythmic     | 23.28     |
| V1-92                   | 9/19/2010  | 12/6/2010 | 5679  | m   | NoCre       | Clock(fl/fl) | Npas2(m/m) | CN4                    | 2 Rhythmic                                 | Rhythmic              | 24.18         | Rhythmic              | 24.27         | Rhythmic     | 24.25     |
| V1-96                   | 9/21/2010  | 12/6/2010 | 5684  | m   | NoCre       | Clock(fl/fl) | Npas2(m/m) | CN4                    | 2 Rhythmic                                 | Rhythmic              | 23.68         | Rhythmic              | 23.65         | Rhythmic     | 23.68     |
| V2-67                   | 10/18/2010 | 1/25/2011 | 5859  | f   | NoCre       | Clock(fl/fl) | Npas2(m/m) | CN4                    | 2 Rhythmic                                 | Rhythmic              | 23.93         | Rhythmic              | 24.02         | Rhythmic     | 23.85     |
| V2-76                   | 10/9/2010  | 1/25/2011 | 5820  | f   | NoCre       | Clock(fl/fl) | Npas2(m/m) | CN4                    | 2 Rhythmic                                 | Rhythmic              | 23.85         | Rhythmic              | 23.85         | Rhythmic     | 23.92     |
| V2-77                   | 10/24/2010 | 1/25/2011 | 5895  | f   | NoCre       | Clock(fl/fl) | Npas2(m/m) | CN4                    | 2 Rhythmic                                 | Rhythmic              | 23.42         | Rhythmic              | 23.28         | Rhythmic     | 23.15     |
| V2-79                   | 11/5/2010  | 1/25/2011 | 5934  | f   | NoCre       | Clock(fl/fl) | Npas2(m/m) | CN4                    | 2 Rhythmic                                 | Rhythmic              | 23.6          | Rhythmic              | 23.5          | Rhythmic     | 23.58     |
| V2-109                  | 10/30/2010 | 1/25/2011 | 5933  | m   | NoCre       | Clock(fl/fl) | Npas2(m/m) | CN4                    | 2 Rhythmic                                 | Rhythmic              | 23.9          | Rhythmic              | 23.87         | Rhythmic     | 23.77     |
| V3-86                   | 11/26/2010 | 4/5/2011  | 5999  | m   | NoCre       | Clock(fl/fl) | Npas2(m/m) | CN4                    | 2 Rhythmic                                 | Rhythmic              | 24.03         | Rhythmic              | 23.98         | No segment 3 |           |
| V3-87                   | 11/26/2010 | 4/5/2011  | 7026  | m   | NoCre       | Clock(fl/fl) | Npas2(m/m) | CN4                    | 2 Rhythmic                                 | Rhythmic              | 24.25         | Rhythmic              | 24.3          | No segment 3 |           |
| V3-91                   | 11/26/2010 | 4/5/2011  | 7030  | f   | NoCre       | Clock(fl/fl) | Npas2(m/m) | CN4                    | 2 Rhythmic                                 | Rhythmic              | 23.58         | Rhythmic              | 23.45         | No segment 3 |           |
| V3-93                   | 1/16/2011  | 4/5/2011  | 7199  | f   | NoCre       | Clock(fl/fl) | Npas2(m/m) | CN4                    | 2 Rhythmic                                 | Rhythmic              | 23.9          | Rhythmic              | 23.85         | No segment 3 |           |
| V4-54                   | 1/18/2011  | 4/14/2011 | 7212  | f   | NoCre       | Clock(fl/fl) | Npas2(m/m) | CN4                    | 2 Rhythmic                                 | Rhythmic              | 23.78         | No segment 2          |               | No segment 3 |           |
| V4-55                   | 1/18/2011  | 4/14/2011 | 7211  | f   | NoCre       | Clock(fl/fl) | Npas2(m/m) | CN4                    | 2 Rhythmic                                 | Rhythmic              | 23.9          | No segment 2          |               | No segment 3 |           |
| V5-64                   | 5/21/2011  | 9/2/2011  | 7639  | m   | NoCre       | Clock(fl/fl) | Npas2(m/m) | CN4                    | 2 Rhythmic                                 | Rhythmic              | 23.7          | Rhythmic              | 23.73         | No segment 3 |           |
| V5-73                   | 4/29/2011  | 9/2/2011  | 7569  | f   | NoCre       | Clock(fl/fl) | Npas2(m/m) | CN4                    | 2 Rhythmic                                 | Rhythmic              | 23.87         | Rhythmic              | 23.5          | No segment 3 |           |
| V5-77                   | 5/21/2011  | 9/2/2011  | 7641  | f   | NoCre       | Clock(fl/fl) | Npas2(m/m) | CN4                    | 2 Rhythmic                                 | Rhythmic              | 23.98         | Rhythmic              | 23.98         | No segment 3 |           |
| V5-78                   | 5/21/2011  | 9/2/2011  | 7640  | f   | NoCre       | Clock(fl/fl) | Npas2(m/m) | CN4                    | 2 Rhythmic                                 | Rhythmic              | 23.38         | Rhythmic              | 23.63         | No segment 3 |           |
| V5-79                   | 4/29/2011  | 9/2/2011  | 7570b | f   | NoCre       | Clock(fl/fl) | Npas2(m/m) | CN4                    | 2 Rhythmic                                 | Rhythmic              | 24.07         | Rhythmic              | 23.98         | No segment 3 |           |
| V5-111                  | 4/29/2011  | 9/2/2011  | 7565  | m   | NoCre       | Clock(fl/fl) | Npas2(m/m) | CN4                    | 2 Rhythmic                                 | Rhythmic              | 22.67         | Rhythmic              | 22.75         | No segment 3 |           |
| V5-112                  | 4/29/2011  | 9/2/2011  | 7566  | m   | NoCre       | Clock(fl/fl) | Npas2(m/m) | CN4                    | 2 Rhythmic                                 | Rhythmic              | 23.17         | Rhythmic              | 22.93         | No segment 3 |           |
| V9-088                  | 7/21/2014  | #####     | 3180  | m   | NoCre       | Clock(fl/fl) | Npas2(m/m) | CN4                    | 2 Rhythmic                                 | Rhythmic              | 23.48         | Rhythmic              | 23.47         | Rhythmic     | 23.47     |
| V9-091                  | 7/22/2014  | #####     | 3217  | f   | NoCre       | Clock(fl/fl) | Npas2(m/m) | CN4                    | 2 Rhythmic                                 | Rhythmic              | 23.68         | Rhythmic              | 23.92         | Rhythmic     | 23.6      |
| V1-98                   | 9/21/2010  | 12/6/2010 | 5686  | m   | Vgat-Cre+   | Clock(fl/fl) | Npas2(m/+) | CN3-allele             | 3 Delayed arrhythmicity                    | rhythmic              | 23.92         | Rhythmic / delayed AR | 24.23         | Arrhythmic   | N.A.      |
| V1-99                   | 9/21/2010  | 12/6/2010 | 5687  | m   | Vgat-Cre+   | Clock(fl/fl) | Npas2(m/+) | CN3-allele             | 3 Delayed arrhythmicity                    | rhythmic              | 24.2          | Arrhythmic            | N.A.          | Arrhythmic   | N.A.      |
| V2-75                   | 10/9/2010  | 1/25/2011 | 5822  | f   | Vgat-Cre+   | Clock(fl/fl) | Npas2(m/+) | CN3-allele             | 3 Rhythmic                                 | Rhythmic              | 23.22         | Rhythmic              | 22.35         | Rhythmic     | 21.92     |
| V6-087                  | 4/5/2011   | 1/23/2012 | 7451  | f   | Vgat-Cre+   | Clock(fl/fl) | Npas2(m/+) | CN3-allele             | 3 Rhythmic in seg 1; weird in LP segment   | Rhythmic              | 24.3          | light pulses          |               | light pulses |           |
| V6-093                  | 7/26/2011  | 1/23/2012 | 7905  | f   | Vgat-Cre+   | Clock(fl/fl) | Npas2(m/+) | CN3-allele             | 3 Rhythmic in seg 1; weird in LP segment   | Rhythmic then AR      | 25.38         | light pulses          |               | light pulses |           |
| V6-096                  | 7/8/2011   | 1/23/2012 | 7834  | m   | Vgat-Cre+   | Clock(fl/fl) | Npas2(m/+) | CN3-allele             | 3 Rhythmic in seg 1; weird in LP segment   | Rhythmic              | 24.7          | light pulses          |               | light pulses |           |
| V2-78                   | 10/9/2010  | 1/25/2011 | 5821  | f   | NoCre       | Clock(fl/fl) | Npas2(m/+) | control for CN3-allele | 4 Rhythmic                                 | Rhythmic              | 24.03         | Rhythmic              | 24.12         | Rhythmic     | 24.22     |
| V6-088                  | 7/26/2011  | 1/23/2012 | 7909  | f   | NoCre       | Clock(fl/fl) | Npas2(m/+) | control for CN3-allele | 4 Rhythmic in seg 1 & through Light Pulses | Rhythmic              | 23.95         | light pulses          |               | light pulses |           |
| V1-88                   | 9/15/2010  | 12/6/2010 | 5655  | m   | Vgat-Cre+   | Clock(fl/+)  | Npas2(m/m) | CN-3opposite           | 5 Rhythmic                                 | Rhythmic              | 23.93         | Rhythmic              | 24.08         | Rhythmic     | 24.07     |
| V1-89                   | 9/15/2010  | 12/6/2010 | 5699  | m   | Vgat-Cre+   | Clock(fl/+)  | Npas2(m/m) | CN-3opposite           | 5 Rhythmic                                 | Rhythmic              | 23.37         | Rhythmic              | 23.58         | Rhythmic     | 23.63     |
| V1-95                   | 9/19/2010  | 12/6/2010 | 5683  | m   | Vgat-Cre+   | Clock(fl/+)  | Npas2(m/m) | CN-3opposite           | 5 Rhythmic                                 | Rhythmic              | 23.67         | Rhythmic              | 23.6          | Rhythmic     | 23.63     |
| V1-100                  | 9/21/2010  | 12/6/2010 | 5688  | m   | Vgat-Cre+   | Clock(fl/+)  | Npas2(m/m) | CN-3opposite           | 5 Rhythmic                                 | Rhythmic              | 23.93         | Rhythmic              | 23.97         | Rhythmic     | 23.98     |
| V1-102                  | 9/15/2010  | 12/6/2010 | 5702  | f   | Vgat-Cre+   | Clock(fl/+)  | Npas2(m/m) | CN-3opposite           | 5 Rhythmic                                 | Rhythmic              | 23.45         | Rhythmic              | 23.02         | Rhythmic     | 22.9      |
| V2-112                  | 10/24/2010 | 1/25/2011 | 5894  | m   | Vgat-Cre+   | Clock(fl/+)  | Npas2(m/m) | CN-3opposite           | 5 Rhythmic                                 | Rhythmic              | 23.55         | Rhythmic              | 23.53         | Rhythmic     | 23.55     |
| V2-66                   | 10/18/2010 | 1/25/2011 | 5862  | f   | Vgat-Cre+   | Clock(fl/+)  | Npas2(m/m) | CN-3opposite           | 5 Rhythmic                                 | Rhythmic              | 23.7          | Rhythmic              | 23.6          | Rhythmic     | 23.82     |

|        |            |           |       |   |           |            |            |                          |    |                                          |            |                |              |       |              |       |
|--------|------------|-----------|-------|---|-----------|------------|------------|--------------------------|----|------------------------------------------|------------|----------------|--------------|-------|--------------|-------|
| V1-86  | 9/15/2010  | 12/6/2010 | 5651  | m | NoCre     | Clock(f/+) | Npas2(m/m) | control for CN3-opposite | 6  | Rhythmic                                 | Rhythmic   | 22.77          | Rhythmic     | 23.27 | Rhythmic     | 23.13 |
| V2-111 | 10/24/2010 | 1/25/2011 | 5891  | m | NoCre     | Clock(f/+) | Npas2(m/m) | control for CN3-opposite | 6  | Rhythmic                                 | Rhythmic   | 23.3           | Rhythmic     | 23.18 | No segment 3 |       |
| V5-66  | 6/23/2011  | 9/2/2011  | 7724  | m | Vgat-Cre+ | Clock(f/f) | Npas2 (WT) | VC                       | 7  | Delayed arrhythmicity                    | Rhythmic   | 24.9 (exclude) | arrhythmic   | N.A.  | No segment 3 |       |
| V5-69  | 6/23/2011  | 9/2/2011  | 7727a | f | Vgat-Cre+ | Clock(f/f) | Npas2 (WT) | VC                       | 7  | Rhythmic                                 | Rhythmic   | 23.23          | Rhythmic     | 23.37 | No segment 3 |       |
| V5-71  | 6/23/2011  | 9/2/2011  | 7727b | f | Vgat-Cre+ | Clock(f/f) | Npas2 (WT) | VC                       | 7  | Rhythmic                                 | Rhythmic   | 23.95          | Rhythmic     | 23.97 | No segment 3 |       |
| V6-091 | 4/5/2011   | 1/23/2012 | 7452  | f | Vgat-Cre+ | Clock(f/f) | Npas2 (WT) | VC                       | 7  | Rhythmic in seg 1; weird in LP segment   | Rhythmic   | 23.18          | light pulses |       | light pulses |       |
| V6-094 | 7/26/2011  | 1/23/2012 | 7906  | m | Vgat-Cre+ | Clock(f/f) | Npas2 (WT) | VC                       | 7  | Rhythmic in seg 1; weird in LP segment   | Rhythmic   | 24             | light pulses |       | light pulses |       |
| V6-095 | 7/8/2011   | 1/23/2012 | 7833  | m | Vgat-Cre+ | Clock(f/f) | Npas2 (WT) | VC                       | 7  | Rhythmic in seg 1; weird in LP segment   | Rhythmic   | 23.85          | light pulses |       | light pulses |       |
| V6-097 | 7/8/2011   | 1/23/2012 | 7837  | f | Vgat-Cre+ | Clock(f/f) | Npas2 (WT) | VC                       | 7  | Rhythmic seg 1 & big phase shifts        | Rhythmic   | 24.22          | light pulses |       | light pulses |       |
| V6-098 | 7/8/2011   | 1/23/2012 | 7838  | f | Vgat-Cre+ | Clock(f/f) | Npas2 (WT) | VC                       | 7  | Rhythmic in seg 1; weird in LP segment   | Rhythmic   | 23.37          | light pulses |       | light pulses |       |
| V6-099 | 7/8/2011   | 1/23/2012 | 7839  | f | Vgat-Cre+ | Clock(f/f) | Npas2 (WT) | VC                       | 7  | Rhythmic in seg 1 & through Light Pulses | Rhythmic   | 23.13          | light pulses |       | light pulses |       |
| V6-100 | 7/8/2011   | 1/23/2012 | 7840  | f | Vgat-Cre+ | Clock(f/f) | Npas2 (WT) | VC                       | 7  | Rhythmic seg 1 & big phase shifts        | Rhythmic   | 23.08          | light pulses |       | light pulses |       |
| V5-109 | 9/1/2010   | 9/2/2011  | 5588  | m | NoCre     | Clock(f/f) | Npas2 (WT) | control for VC           | 8  | Rhythmic                                 | Rhythmic   | 24.03          | Rhythmic     | 23.9  | No segment 3 |       |
| V6-089 | 7/26/2011  | 1/23/2012 | 7908  | f | NoCre     | Clock(f/f) | Npas2 (WT) | control for VC           | 8  | Rhythmic in seg 1 & through Light Pulses | Rhythmic   | 23.95          | light pulses |       | light pulses |       |
| V6-090 | 7/26/2011  | 1/23/2012 | 7907  | f | NoCre     | Clock(f/f) | Npas2 (WT) | control for VC           | 8  | Rhythmic in seg 1 & through Light Pulses | Rhythmic   | 23.8           | light pulses |       | light pulses |       |
| V1-97  | 9/21/2010  | 12/6/2010 | 5685  | m | Vgat-Cre+ | Clock(f/+) | Npas2(m/+) | CN-double-het            | 9  | Rhythmic                                 | Rhythmic   | 23.95          | Rhythmic     | 23.98 | Rhythmic     | 24.07 |
| V1-101 | 9/21/2010  | 12/6/2010 | 5689  | m | Vgat-Cre+ | Clock(f/+) | Npas2(m/+) | CN-double-het            | 9  | Rhythmic                                 | Rhythmic   | 23.88          | Rhythmic     | 23.88 | Rhythmic     | 23.88 |
| V2-64  | 10/30/2010 | 1/25/2011 | 5929  | f | Vgat-Cre+ | Clock(f/+) | Npas2(m/+) | CN-double-het            | 9  | Rhythmic                                 | Rhythmic   | 23.98          | Rhythmic     | 24.03 | Rhythmic     | 23.98 |
| V2-82  | 10/30/2010 | 1/25/2011 | 5924  | m | Vgat-Cre+ | Clock(f/+) | Npas2(m/+) | CN-double-het            | 9  | Rhythmic                                 | Rhythmic   | 23.77          | Rhythmic     | 23.75 | Rhythmic     | 23.92 |
| V2-110 | 10/24/2010 | 1/25/2011 | 5893  | m | Vgat-Cre+ | Clock(f/+) | Npas2(m/+) | CN-double-het            | 9  | Rhythmic                                 | Rhythmic   | 23.77          | Rhythmic     | 23.97 | Rhythmic     | 24.18 |
| V6-008 | 7/19/2011  | 1/23/2012 | 7889  | m | Vgat-Cre+ | Clock (WT) | Npas2 (WT) | VCRE+                    | 10 | Rhythmic in seg 1 & through Light Pulses | Rhythmic   | 23.98          | light pulses |       | light pulses |       |
| V6-009 | 7/19/2011  | 1/23/2012 | 7888  | m | Vgat-Cre+ | Clock (WT) | Npas2 (WT) | VCRE+                    | 10 | Rhythmic in seg 1 & through Light Pulses | Rhythmic   | 23.97          | light pulses |       | light pulses |       |
| V6-011 | 8/27/2011  | 1/23/2012 | 8013  | m | Vgat-Cre+ | Clock (WT) | Npas2 (WT) | VCRE+                    | 10 | Rhythmic in seg 1 & through Light Pulses | Rhythmic   | 23.73          | light pulses |       | light pulses |       |
| V6-101 | 9/21/2011  | 1/23/2012 | 8061  | m | Vgat-Cre+ | Clock (WT) | Npas2 (WT) | VCRE+                    | 10 | Rhythmic in seg 1 & through Light Pulses | Rhythmic   | 23.5           | light pulses |       | light pulses |       |
| V6-102 | 9/21/2011  | 1/23/2012 | 8062  | m | Vgat-Cre+ | Clock (WT) | Npas2 (WT) | VCRE+                    | 10 | Rhythmic in seg 1 & through Light Pulses | Rhythmic   | 23.72          | light pulses |       | light pulses |       |
| V6-103 | 9/21/2011  | 1/23/2012 | 8063  | m | Vgat-Cre+ | Clock (WT) | Npas2 (WT) | VCRE+                    | 10 | Rhythmic in seg 1 & through Light Pulses | Rhythmic   | 23.93          | light pulses |       | light pulses |       |
| V6-104 | 8/27/2011  | 1/23/2012 | 8012  | m | Vgat-Cre+ | Clock (WT) | Npas2 (WT) | VCRE+                    | 10 | Rhythmic in seg 1 & through Light Pulses | Rhythmic   | 24             | light pulses |       | light pulses |       |
| V6-105 | 9/21/2011  | 1/23/2012 | 8064  | f | Vgat-Cre+ | Clock (WT) | Npas2 (WT) | VCRE+                    | 10 | Rhythmic in seg 1 & through Light Pulses | Rhythmic   | 23.55          | light pulses |       | light pulses |       |
| V8-087 | 3/10/2012  | 8/7/2012  | 8239  | m | Vgat-Cre+ | Clock (WT) | Npas2 (WT) | VCRE+                    | 10 | Rhythmic in seg 1 & through Light Pulses | Rhythmic   | 23.75          | light pulses |       | light pulses |       |
| V8-088 | 3/10/2012  | 8/7/2012  | 8242  | m | Vgat-Cre+ | Clock (WT) | Npas2 (WT) | VCRE+                    | 10 | Rhythmic in seg 1 & through Light Pulses | Rhythmic   | 23.72          | light pulses |       | light pulses |       |
| V8-089 | 3/10/2012  | 8/7/2012  | 8216  | f | Vgat-Cre+ | Clock (WT) | Npas2 (WT) | VCRE+                    | 10 | Rhythmic in seg 1 & through Light Pulses | Rhythmic   | 23.82          | light pulses |       | light pulses |       |
| V8-090 | 2/8/2012   | 8/7/2012  | 8203  | m | Vgat-Cre+ | Clock (WT) | Npas2 (WT) | VCRE+                    | 10 | Rhythmic in seg 1 & through Light Pulses | Rhythmic   | 23.68          | light pulses |       | light pulses |       |
| V8-091 | 3/10/2012  | 8/7/2012  | 8245  | f | Vgat-Cre+ | Clock (WT) | Npas2 (WT) | VCRE+                    | 10 | Rhythmic in seg 1 & through Light Pulses | Rhythmic   | 23.68          | light pulses |       | light pulses |       |
| V8-092 | 4/15/2012  | 8/7/2012  | 8370  | f | Vgat-Cre+ | Clock (WT) | Npas2 (WT) | VCRE+                    | 10 | Rhythmic in seg 1 & through Light Pulses | Rhythmic   | 23.9           | light pulses |       | light pulses |       |
| V8-093 | 5/16/2012  | 8/7/2012  | 8557  | m | Vgat-Cre+ | Clock (WT) | Npas2 (WT) | VCRE+                    | 10 | Rhythmic in seg 1 & through Light Pulses | Rhythmic   | 23.87          | light pulses |       | light pulses |       |
| V8-094 | 2/8/2012   | 8/7/2012  | 8202  | m | Vgat-Cre+ | Clock (WT) | Npas2 (WT) | VCRE+                    | 10 | Rhythmic in seg 1 & through Light Pulses | Rhythmic   | 23.87          | light pulses |       | light pulses |       |
| V8-098 | 2/5/2012   | 8/7/2012  | 8193  | m | Vgat-Cre+ | Clock (WT) | Npas2 (WT) | VCRE+                    | 10 | Rhythmic in seg 1 & through Light Pulses | Rhythmic   | 23.82          | light pulses |       | light pulses |       |
| V8-102 | 2/3/2012   | 8/7/2012  | 8194  | m | Vgat-Cre+ | Clock (WT) | Npas2 (WT) | VCRE+                    | 10 | Rhythmic in seg 1 & through Light Pulses | Rhythmic   | 23.87          | light pulses |       | light pulses |       |
| V10-38 | 7/21/2014  | #####     | 3191  | m | Vgat-CRE+ | Bmal1(f/f) |            | VCRE+; Bmal1(f/f)        | 12 | Arrhythmic                               | Arrhythmic | N.A.           | Arrhythmic   | N.A.  | Arrhythmic   | N.A.  |
| V10-40 | 7/21/2014  | #####     | 3188  | m | Vgat-CRE+ | Bmal1(f/f) |            | VCRE+; Bmal1(f/f)        | 12 | Arrhythmic                               | Arrhythmic | N.A.           | Arrhythmic   | N.A.  | Arrhythmic   | N.A.  |
| V10-43 | 7/17/2014  | #####     | 3131  | m | Vgat-CRE+ | Bmal1(f/f) |            | VCRE+; Bmal1(f/f)        | 12 | Arrhythmic                               | Arrhythmic | N.A.           | Arrhythmic   | N.A.  | Arrhythmic   | N.A.  |
| V10-44 | 7/17/2014  | #####     | 3129  | m | Vgat-CRE+ | Bmal1(f/f) |            | VCRE+; Bmal1(f/f)        | 12 | Arrhythmic                               | Arrhythmic | N.A.           | Arrhythmic   | N.A.  | Arrhythmic   | N.A.  |
| V10-51 | 8/18/2014  | #####     | 3478  | m | Vgat-CRE+ | Bmal1(f/f) |            | VCRE+; Bmal1(f/f)        | 12 | Arrhythmic                               | Arrhythmic | N.A.           | Arrhythmic   | N.A.  | Arrhythmic   | N.A.  |
| V10-53 | 8/17/2014  | #####     | 3471  | m | Vgat-CRE+ | Bmal1(f/f) |            | VCRE+; Bmal1(f/f)        | 12 | Arrhythmic                               | Arrhythmic | N.A.           | Arrhythmic   | N.A.  | Arrhythmic   | N.A.  |
| V10-54 | 8/18/2014  | #####     | 3475  | m | Vgat-CRE+ | Bmal1(f/f) |            | VCRE+; Bmal1(f/f)        | 12 | Arrhythmic                               | Arrhythmic | N.A.           | Arrhythmic   | N.A.  | Arrhythmic   | N.A.  |
| V10-55 | 8/18/2014  | #####     | 3477  | m | Vgat-CRE+ | Bmal1(f/f) |            | VCRE+; Bmal1(f/f)        | 12 | Arrhythmic                               | Arrhythmic | N.A.           | Arrhythmic   | N.A.  | Arrhythmic   | N.A.  |
| V10-63 | 8/17/2014  | #####     | 3474  | f | Vgat-CRE+ | Bmal1(f/f) |            | VCRE+; Bmal1(f/f)        | 12 | Arrhythmic                               | Arrhythmic | N.A.           | Arrhythmic   | N.A.  | Arrhythmic   | N.A.  |
| V10-36 | 6/1/2014   | #####     | 2650  | m | Vgat-CRE+ | (WT)       |            | VCRE+                    | 13 | Rhythmic                                 | Rhythmic   | 23.9           | Rhythmic     | 23.98 | Rhythmic     | 23.98 |
| V10-45 | 6/7/2014   | #####     | 2814  | m | Vgat-CRE+ | (WT)       |            | VCRE+                    | 13 | Rhythmic                                 | Rhythmic   | 23.93          | Rhythmic     | 23.8  | Rhythmic     | 23.93 |
| V10-56 | 5/31/2014  | #####     | 2659  | f | Vgat-CRE+ | (WT)       |            | VCRE+                    | 13 | Rhythmic                                 | Rhythmic   | 23.9           | Rhythmic     | 23.97 | Rhythmic     | 23.93 |
| V10-57 | 6/1/2014   | #####     | 2652  | f | Vgat-CRE+ | (WT)       |            | VCRE+                    | 13 | Rhythmic                                 | Rhythmic   | 23.78          | Rhythmic     | 23.67 | Rhythmic     | 23.7  |
| V10-58 | 6/8/2014   | #####     | 2820  | f | Vgat-CRE+ | (WT)       |            | VCRE+                    | 13 | Rhythmic                                 | Rhythmic   | 23.73          | Rhythmic     | 23.55 | Rhythmic     | 23.33 |
| V10-37 | 6/1/2014   | #####     | 2649  | m | NoCre     | Bmal1(f/f) |            | Bmal1(f/f)               | 14 | Rhythmic                                 | Rhythmic   | 23.87          | Rhythmic     | 23.87 | Rhythmic     | 23.92 |
| V10-39 | 7/21/2014  | #####     | 3190  | m | NoCre     | Bmal1(f/f) |            | Bmal1(f/f)               | 14 | Rhythmic                                 | Rhythmic   | 23.78          | Rhythmic     | 23.87 | Rhythmic     | 23.95 |
| V10-41 | 6/4/2014   | #####     | 2781  | m | NoCre     | Bmal1(f/f) |            | Bmal1(f/f)               | 14 | Rhythmic                                 | Rhythmic   | 23.52          | Rhythmic     | 23.47 | Rhythmic     | 23.4  |
| V10-42 | 6/4/2014   | #####     | 2783  | m | NoCre     | Bmal1(f/f) |            | Bmal1(f/f)               | 14 | Rhythmic                                 | Rhythmic   | 23.8           | Rhythmic     | 23.88 | Rhythmic     | 23.85 |
| V10-50 | 8/18/2014  | #####     | 3476  | m | NoCre     | Bmal1(f/f) |            | Bmal1(f/f)               | 14 | Rhythmic                                 | Rhythmic   | 23.37          | Rhythmic     | 23.55 | Rhythmic     | 23.8  |
| V10-52 | 8/17/2014  | #####     | 3472  | m | NoCre     | Bmal1(f/f) |            | Bmal1(f/f)               | 14 | Rhythmic                                 | Rhythmic   | 23.62          | Rhythmic     | 23.78 | Rhythmic     | 23.85 |
| V10-59 | 7/17/2014  | #####     | 3133  | f | NoCre     | Bmal1(f/f) |            | Bmal1(f/f)               | 14 | Rhythmic                                 | Rhythmic   | 23.82          | Rhythmic     | 23.93 | Rhythmic     | 23.87 |
| V10-60 | 6/5/2014   | #####     | 2792  | f | NoCre     | Bmal1(f/f) |            | Bmal1(f/f)               | 14 | Rhythmic                                 | Rhythmic   | 23.68          | Rhythmic     | 23.72 | Rhythmic     | 23.73 |
| V10-61 | 5/30/2014  | #####     | 2647  | f | NoCre     | Bmal1(f/f) |            | Bmal1(f/f)               | 14 | Rhythmic                                 | Rhythmic   | 23.87          | Rhythmic     | 23.95 | Rhythmic     | 23.85 |
| V10-62 | 7/21/2014  | #####     | 3194  | f | NoCre     | Bmal1(f/f) |            | Bmal1(f/f)               | 14 | Rhythmic                                 | Rhythmic   | 23.83          | Rhythmic     | 23.95 | Rhythmic     | 23.8  |

## Supplemental Figure Legends

**Figure S1.** Double-plotted actograms of all animals reported in this study. Each animal is identified by a unique code consisting of cohort (V1 through V-10), hyphen, channel number. Genotypes are listed above each actogram. Light is indicated by yellow shading.

**Figure S2.** Persistence of rhythmicity in one *Vgat-Cre<sup>+</sup>; Clock<sup>fl/fl</sup>; Npas2<sup>m/+</sup>* mouse (V2-75). Two other mice of this genotype became arrhythmic with extended time in constant darkness, as shown in Figure 4.

**Figure S3.** Severely disrupted rhythms and abnormal responses to light pulses (LP) in *Vgat-Cre<sup>+</sup>; Clock<sup>fl/fl</sup>; Npas2<sup>m/m</sup>* mice. Actograms of mice V6-93 (A), V6-87 (B) and V6-96 (C) are shown. Light exposure is in yellow; darkness is gray. The timing of light pulses is indicated at the right of each panel.

**Figure S4.** Gradual loss of rhythmicity in one *Vgat-Cre<sup>+</sup>; Clock<sup>fl/fl</sup>* mouse (V5-66). This animal is atypical for this genotype, with other *Vgat-Cre<sup>+</sup>; Clock<sup>fl/fl</sup>* mice having sustained circadian rhythmicity with a short period in constant darkness.

# Weaver et al., Supplemental Figure S1

Double-plotted actograms of each animal studied, organized by Cohort.  
Light is indicated by yellow shading.

Demographic information and assessment of rhythmicity are listed in Table S1.  
Raw data are in Table S2.

V1-086 NoCre Clock(fl/+) Npas2(m/m) male 5651

1  
2  
3  
4  
5  
6  
7  
8  
9  
10  
11  
12  
13  
14  
15  
16  
17  
18  
19  
20  
21  
22  
23  
24  
25  
26  
27  
28  
29  
30  
31  
32  
33  
34  
35  
36  
37  
38  
39  
40  
41  
42  
43  
44  
45  
46  
47

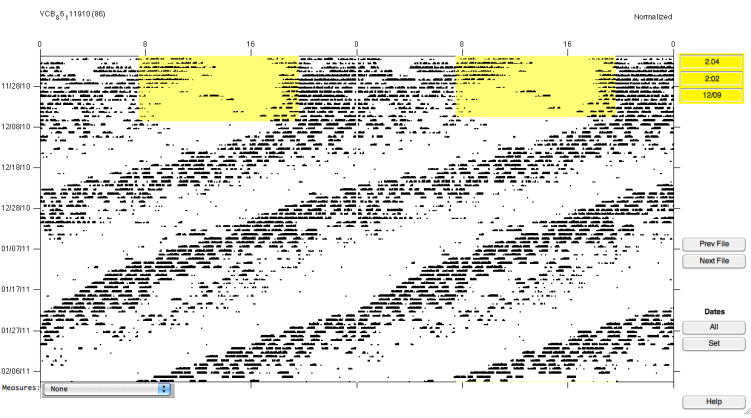

V1-089 VgatCre+ Clock(fl/+) Npas2(m/m) male 5699

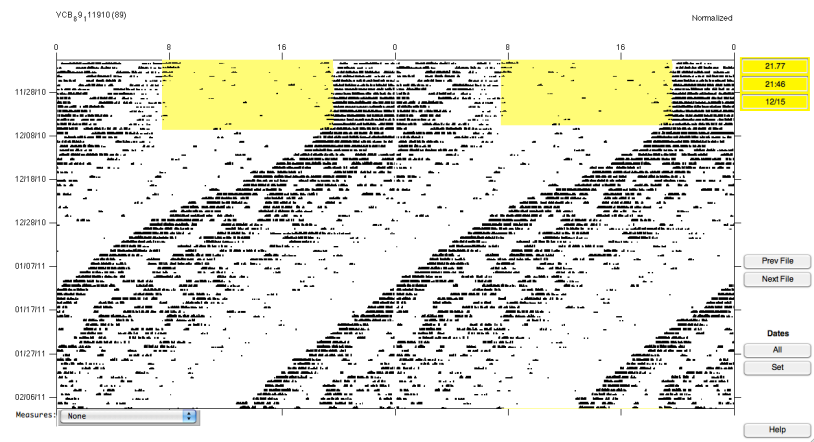

V1-087 NoCre Clock(fl/fl) Npas2(m/m) male 5652

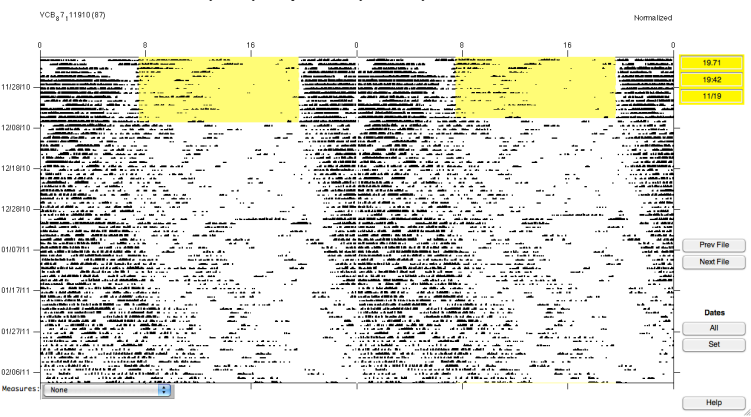

V1-090 NoCre Clock(fl/fl) Npas2(m/m) male 5671

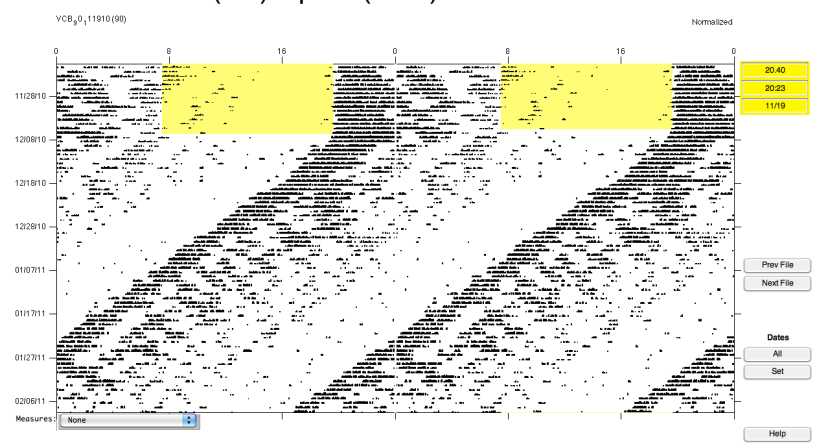

V1-088 VgatCre+ Clock(fl/+) Npas2(m/m) male 5655

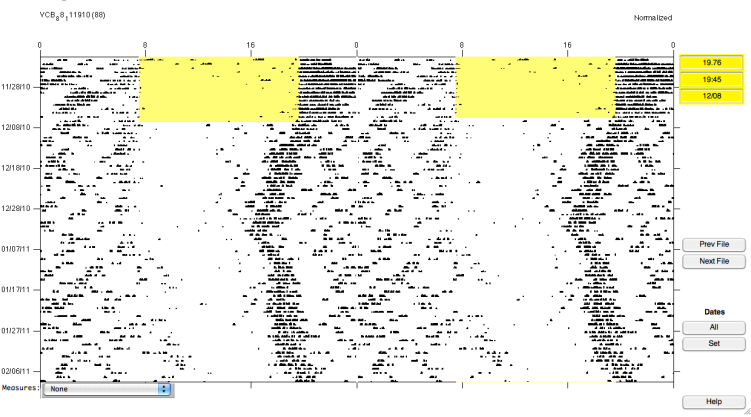

V1-091 NoCre Clock(fl/fl) Npas2(m/m) male 5672

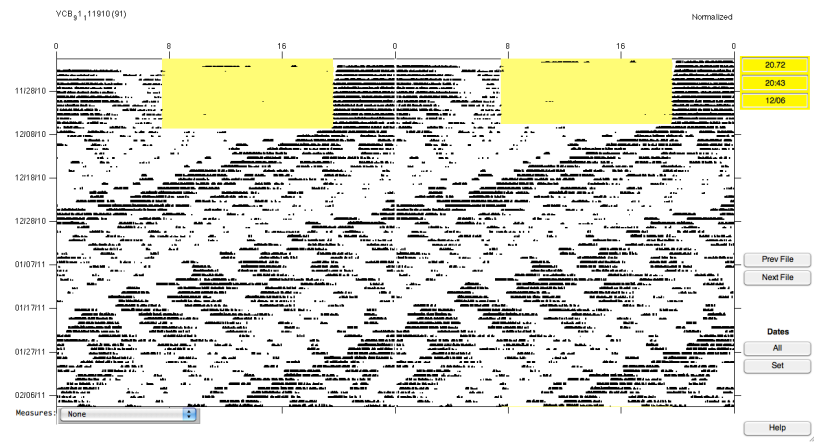

V1-092 NoCre Clock(fl/fl) Npas2(m/m) male 5679

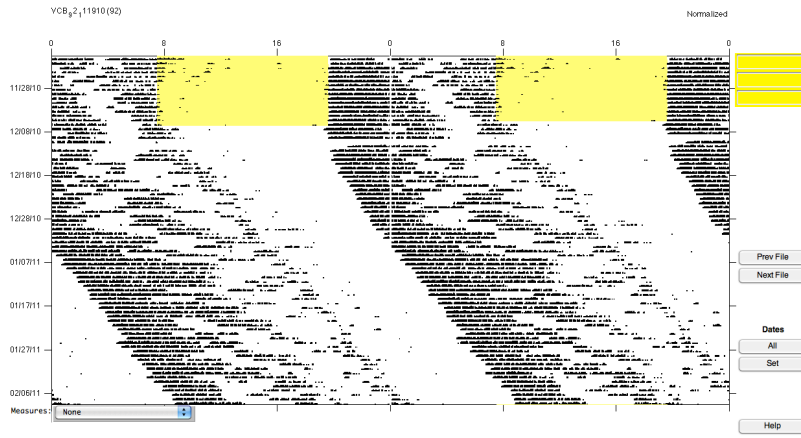

V1-096 NoCre Clock(fl/fl) Npas2(m/m) male 5684

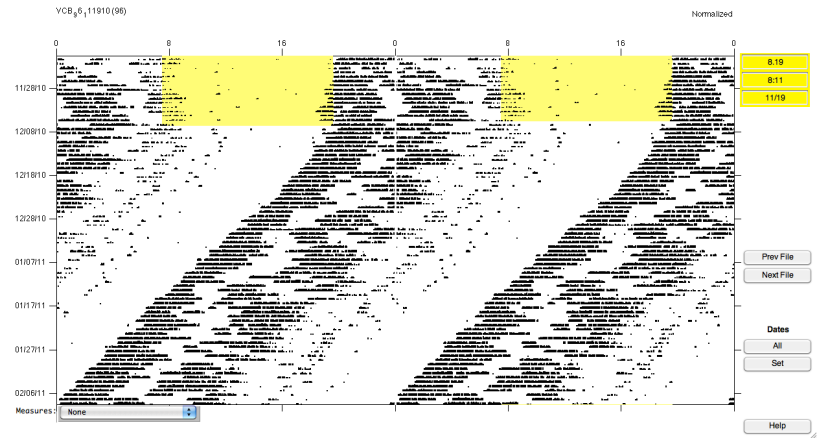

V1-094 Vgat-Cre+ Clock(fl/fl) Npas2(m/m) male 5682

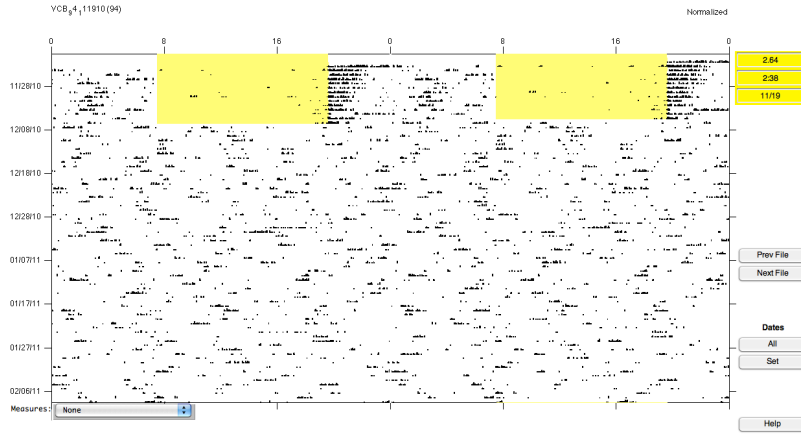

V1-097 Vgat-Cre+ Clock(fl/+) Npas2(m/+) male 5685

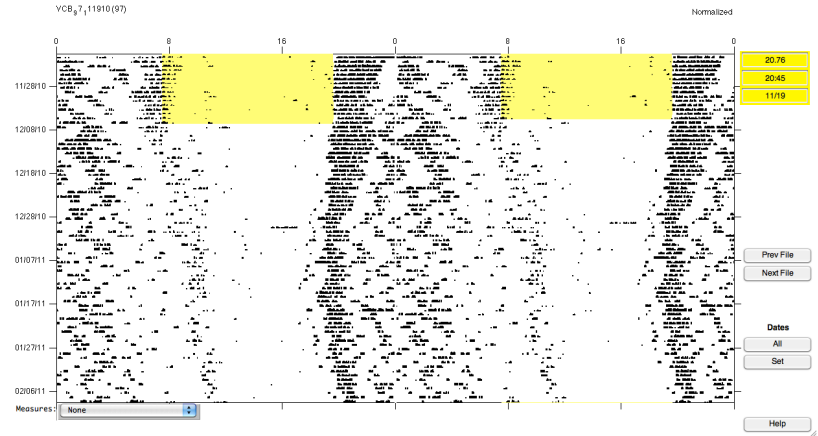

V1-095 Vgat-Cre+ Clock(fl/+) Npas2(m/m) male 5683

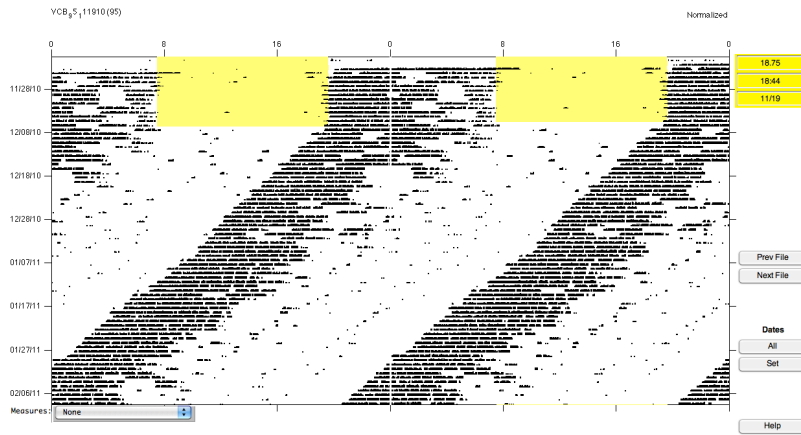

V1-098 Vgat-Cre+ Clock(fl/fl) Npas2(m/+) male 5686

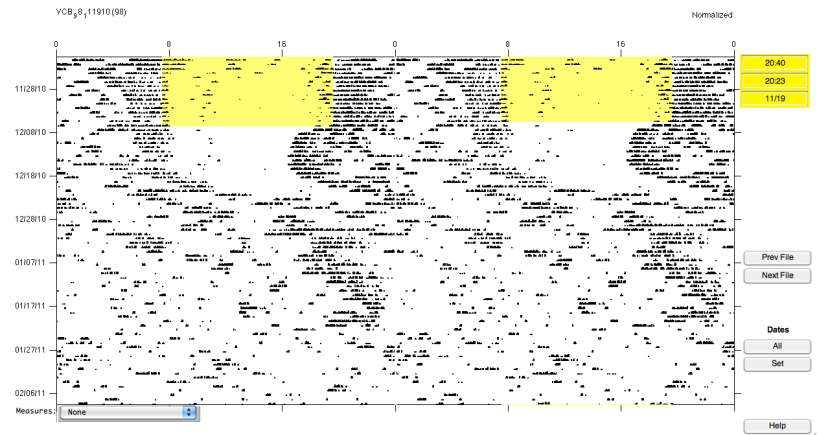



V1- 099 Vgat-Cre+ Clock(fl/fl) Npas2(m/+) male 5687

1  
2  
3  
4  
5  
6  
7  
8  
9  
10  
11  
12  
13  
14  
15  
16  
17  
18  
19  
20  
21  
22  
23  
24  
25  
26  
27  
28  
29  
30  
31  
32  
33  
34  
35  
36  
37  
38  
39  
40  
41  
42  
43  
44  
45  
46  
47

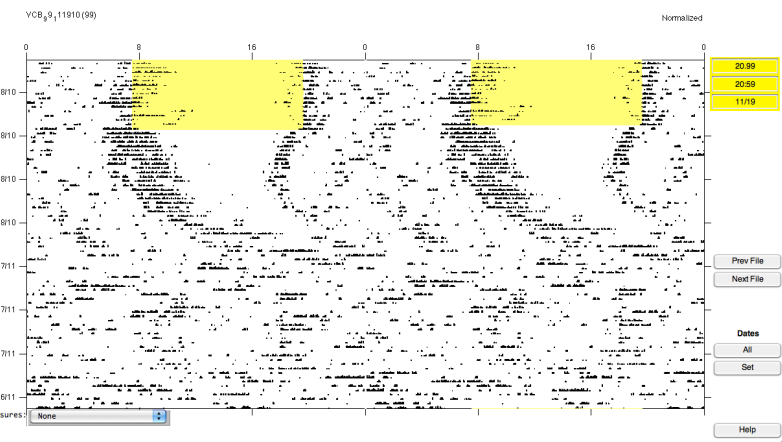

V1-102 Vgat-Cre+ Clock(fl/+) Npas2(m/m) female 5702

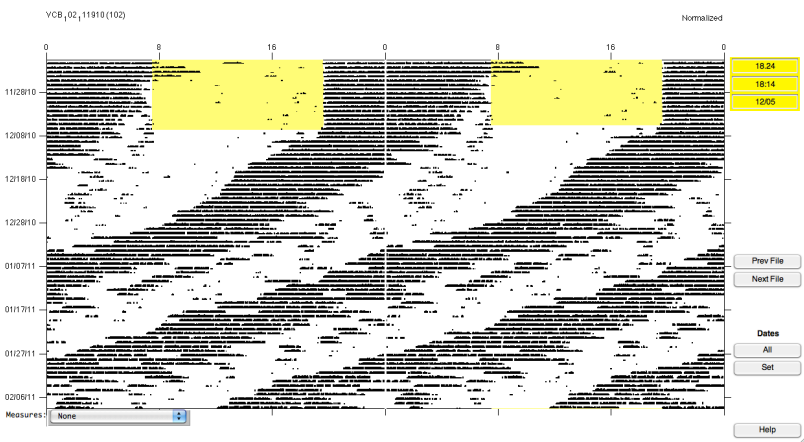

V1-100 Vgat-Cre+ Clock(fl/+) Npas2(m/m) male 5688

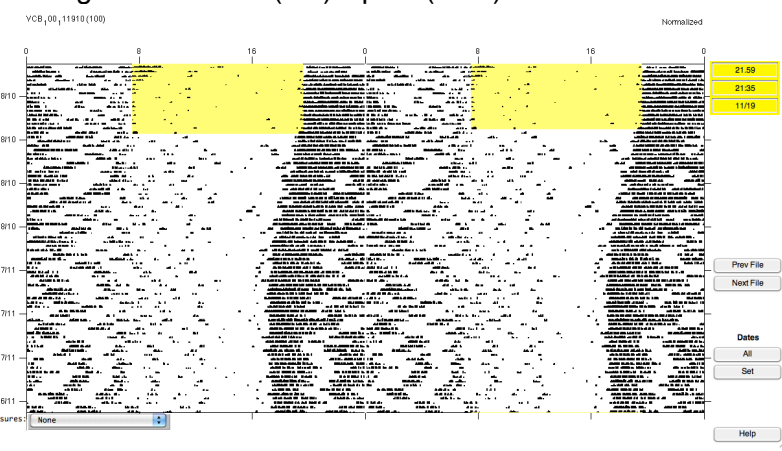

V1-103 Vgat-Cre+ Clock(fl/fl) Npas2(m/m) female 5703

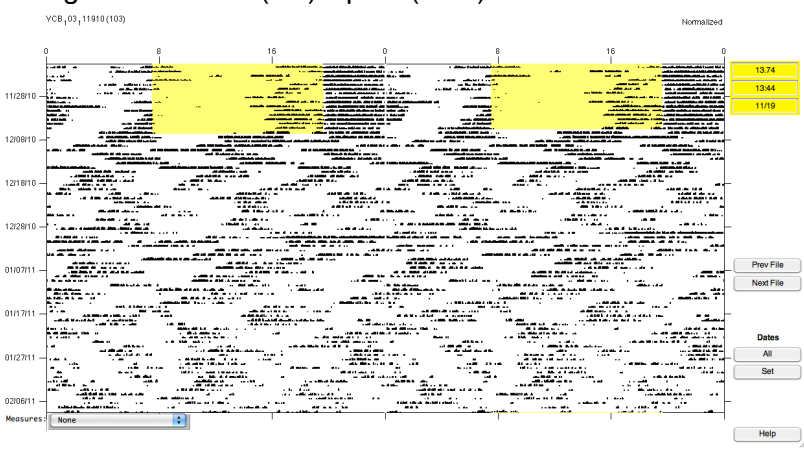

V1-101 Vgat-Cre+ Clock(fl/+) Npas2(m/+) male 5689

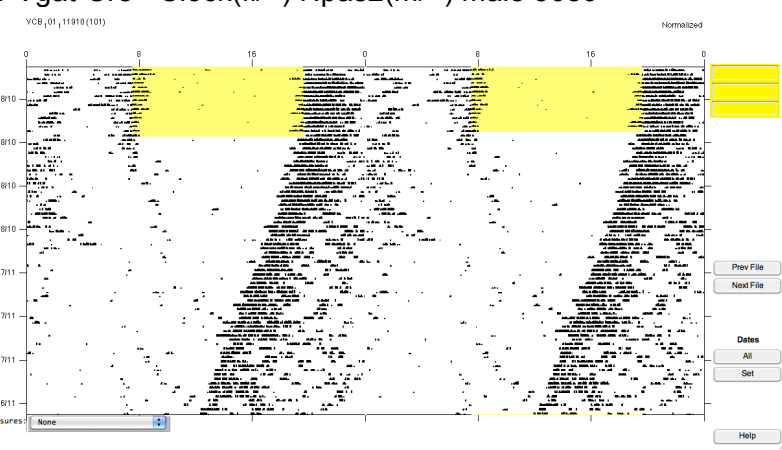

Experiment V2

V2-64 Vgat-Cre+ Clock(fl/+) Npas2(m/+) female 5929

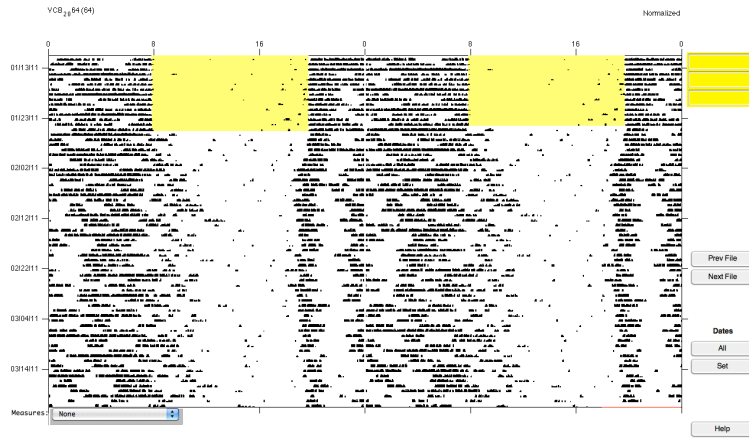

V2-67 No Cre Clock(fl/fl) Npas2(m/m) female 5859

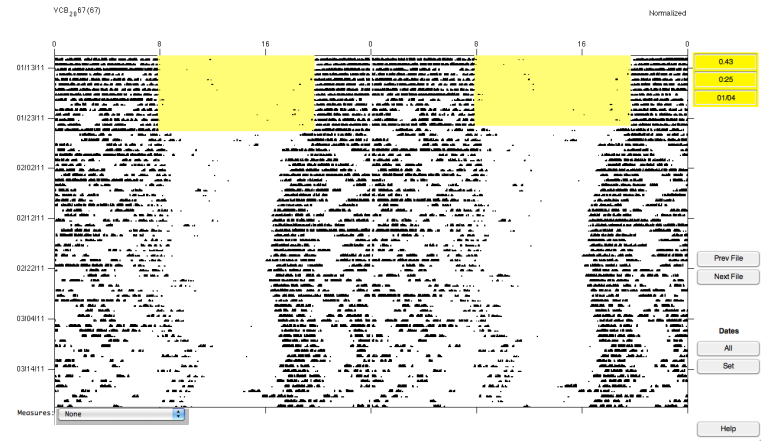

V2-66 Vgat-Cre+ Clock(fl/+) Npas2(m/m) female 5862

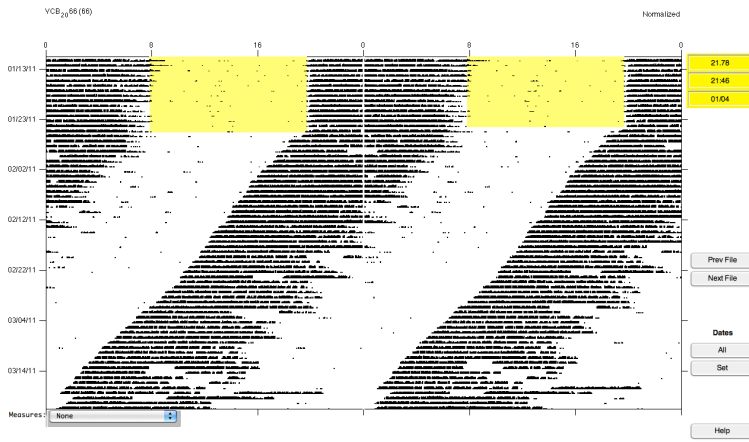

V2-69 Vgat-Cre+ Clock(fl/fl) Npas2(m/m) female 5919

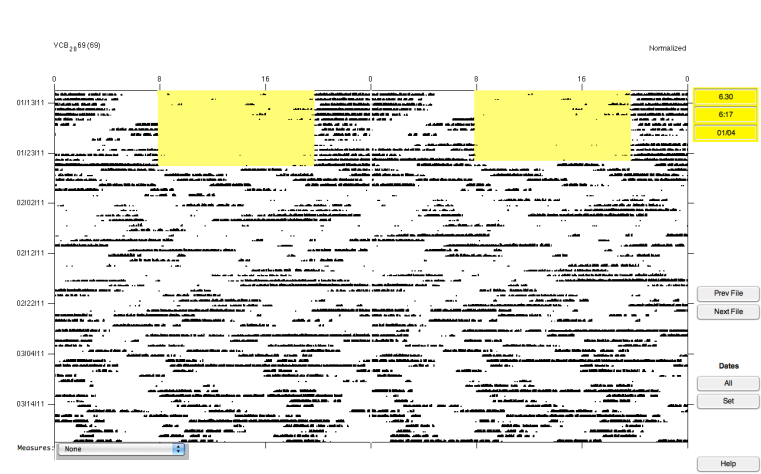

V2-72 Vgat-Cre+ Clock(fl/fl) Npas2(m/m) female 5928

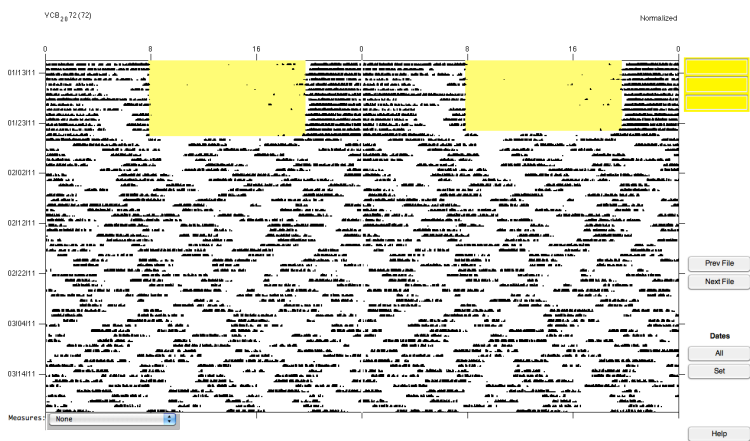

V2-75 Vgat-Cre+ Clock(fl/fl) Npas2(m/+) female 5822

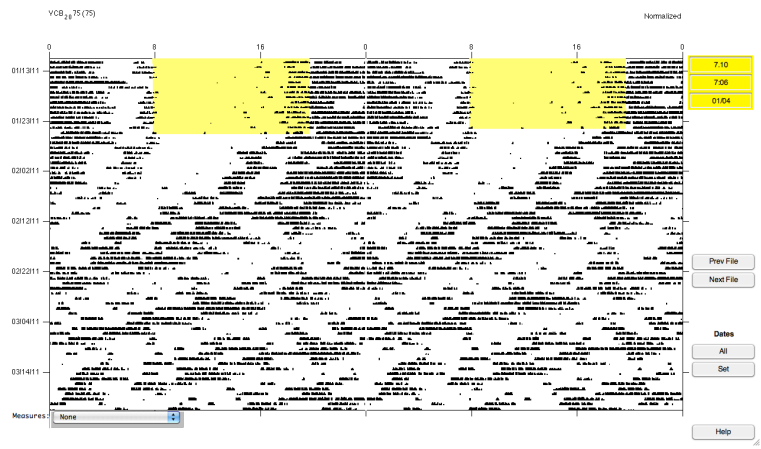

V2-73 Vgat-Cre+ Clock(fl/fl) Npas2(m/m) female 5930

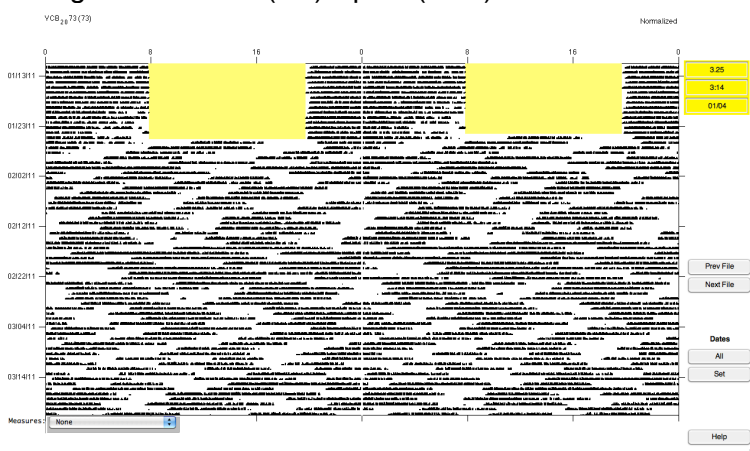

V2-76 No Cre Clock(fl/fl) Npas2(m/m) female 5820

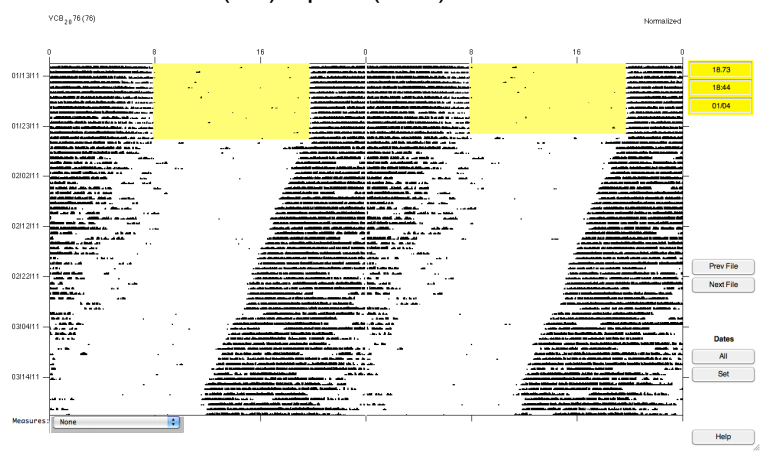

## V2-77 No Cre Clock(fl/fl) Npas2(m/m) female 5895

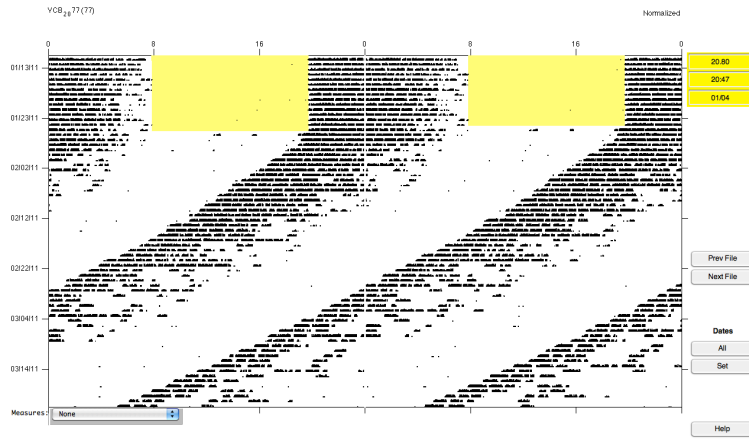

## V2-79 No Cre Clock(fl/fl) Npas2(m/m) female 5934

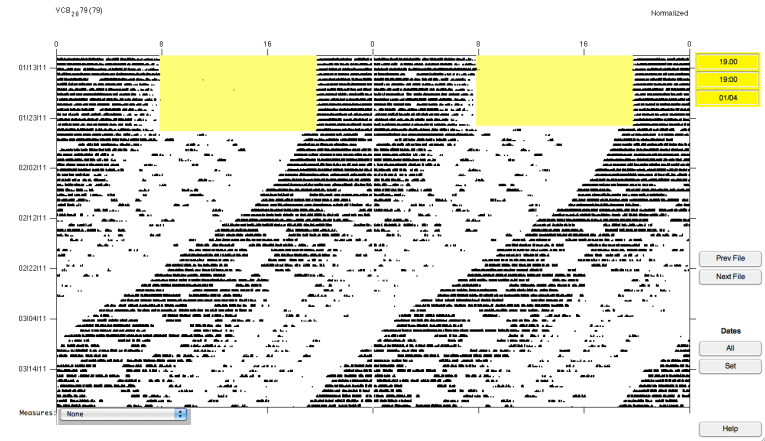

## V2-78 No Cre Clock(fl/fl) Npas2(m/+) female 5821

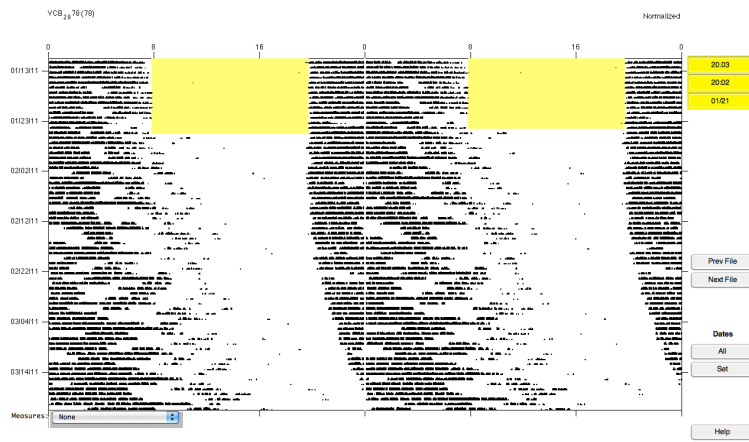

## V2-80 Vgat-Cre+ Clock(fl/fl) Npas2(m/m) male 5922

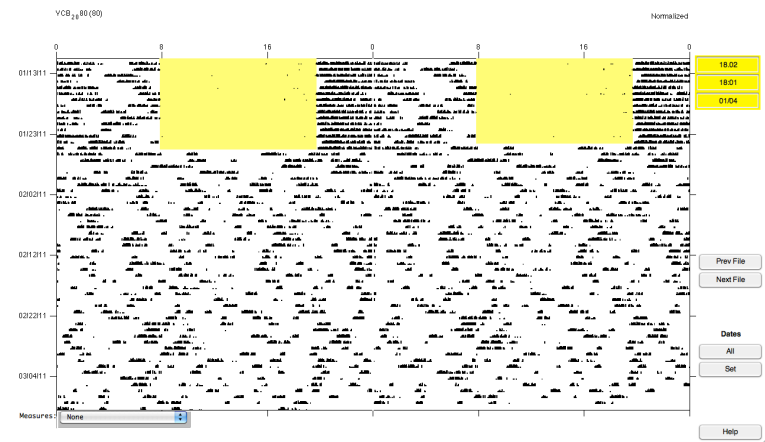

V2-82 Vgat-Cre+ Clock(fl/+) Npas2(m/+) male 5924

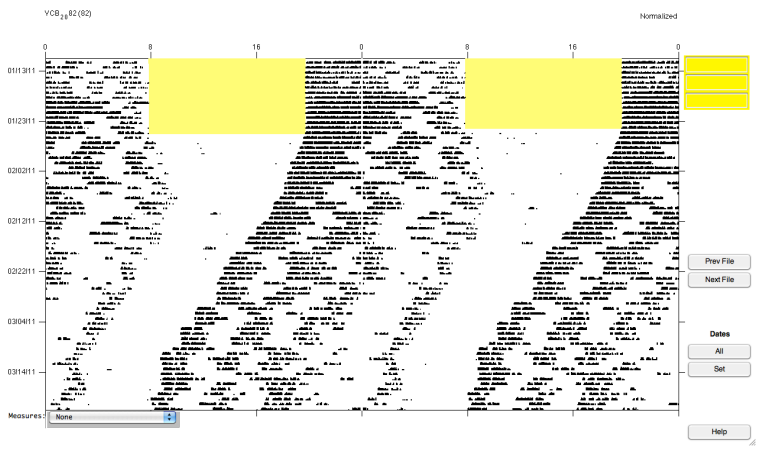

V2- 110 Vgat-Cre+ Clock(fl/+) Npas2(m/+) male 5893

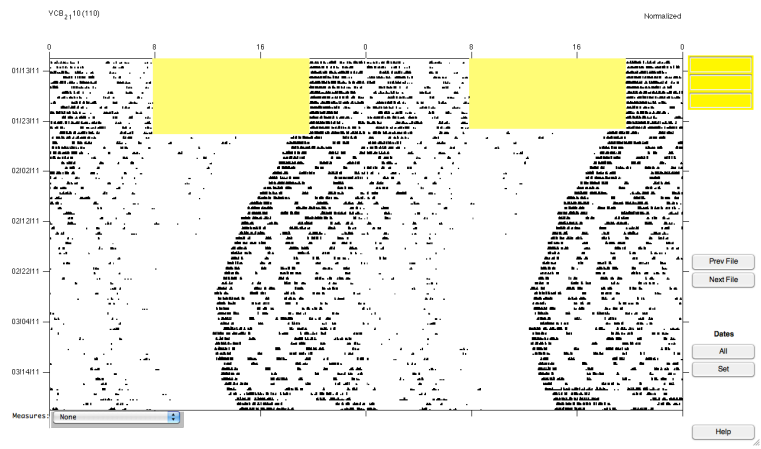

V2-109 No Cre Clock(fl/fl) Npas2(m/m) male 5933

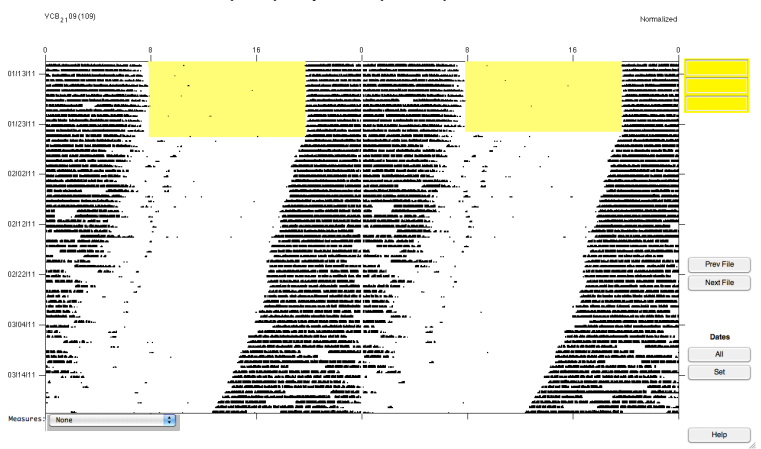

V2-111 No Cre Clock(fl/+) Npas2(m/m) male 5891

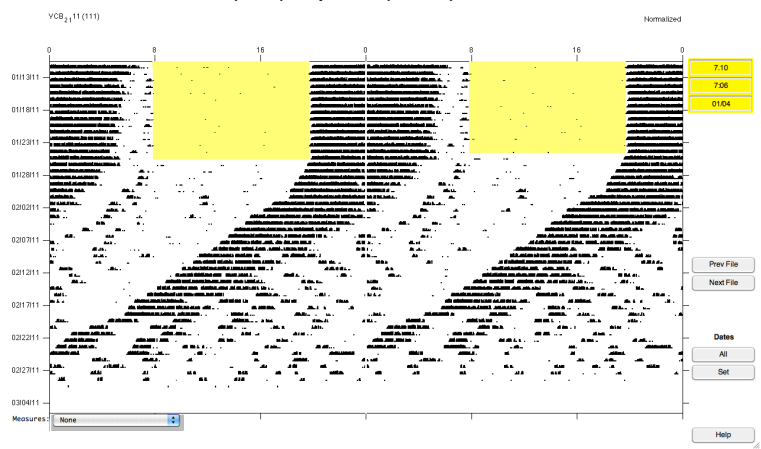

V2-112 Vgat-Cre+ Clock(fl/+) Npas2(m/m) male

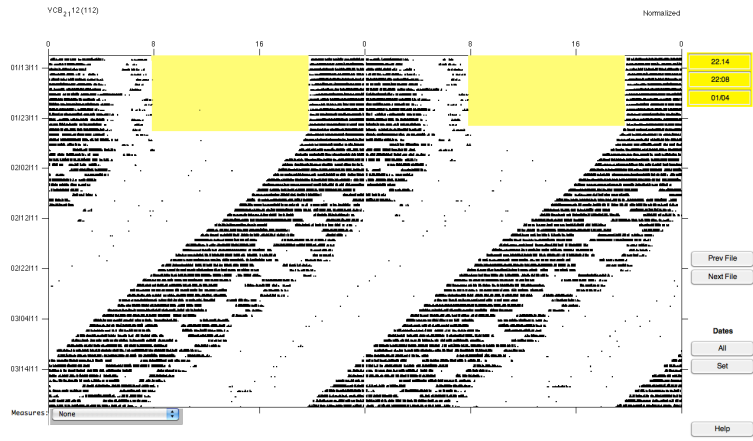

**Experiment V3**

V3-86 NoCre C(fl/fl) N(m/m) m 5999

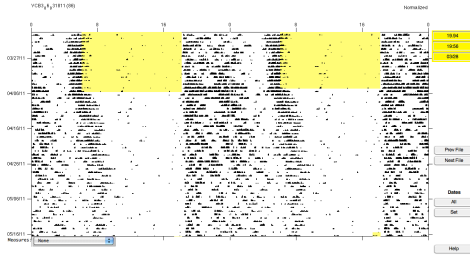

V3-89 Vgat-Cre+ C(fl/fl) N(m/m) m7028

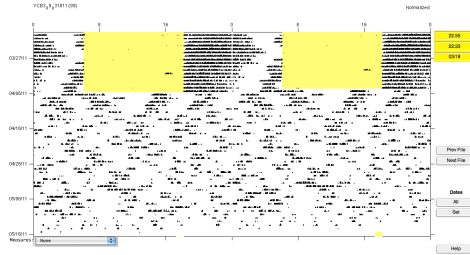

V3-92 Vgat-Cre+ C(fl/fl) N(m/m) f7031

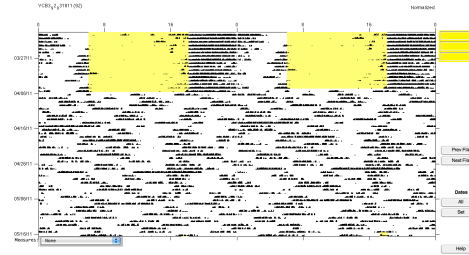

V3-87 NoCre C(fl/fl) N(m/m) m 7026

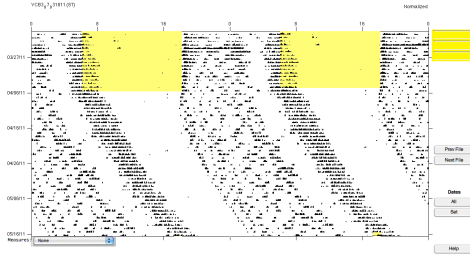

V3-90 Vgat-Cre+ C(fl/fl) N(m/m) m7029

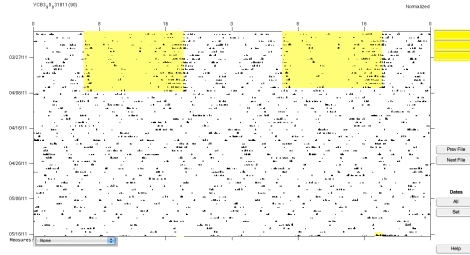

V3-93 NoCre C(fl/fl) N(m/m) f7199

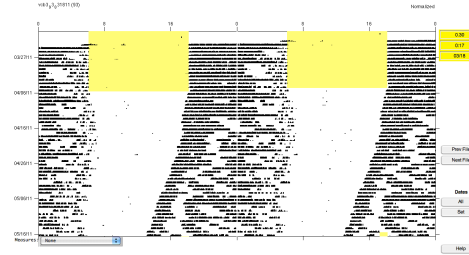

V3-88 Vgat-Cre+ C(fl/fl) N(m/m) m7027

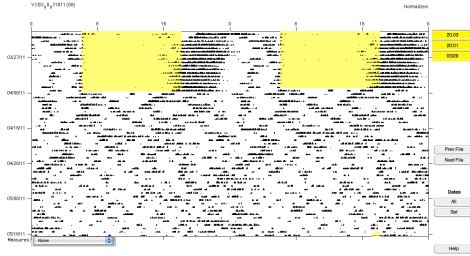

V3-91 NoCre C(fl/fl) N(m/m) f7030

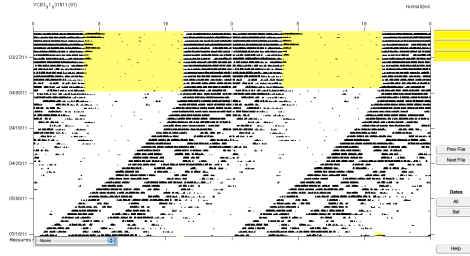

V3-94 Vgat-Cre+ C(fl/fl) N(m/m) m7198

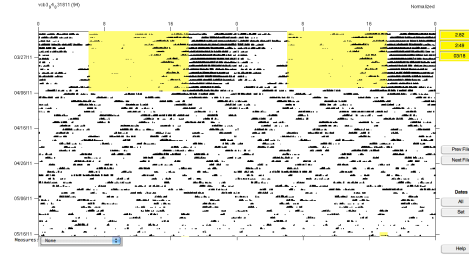

## Experiment V4

## V4-36 Vgat-Cre+ Clock(fl/fl) Npas2(m/m) male 3624

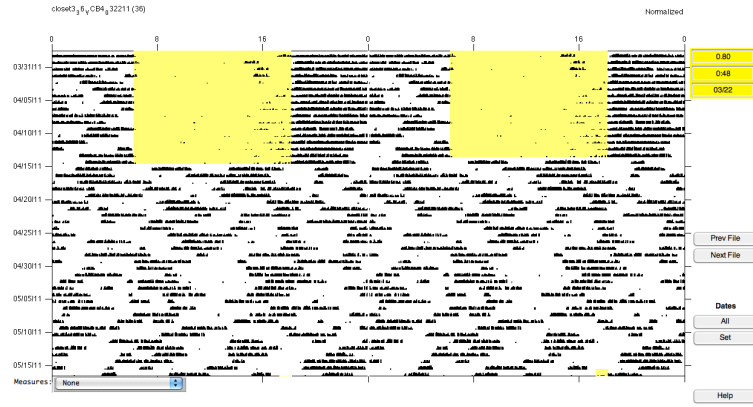

## V4-38 Vgat-Cre+ Clock(fl/fl) Npas2(m/m) female 7076

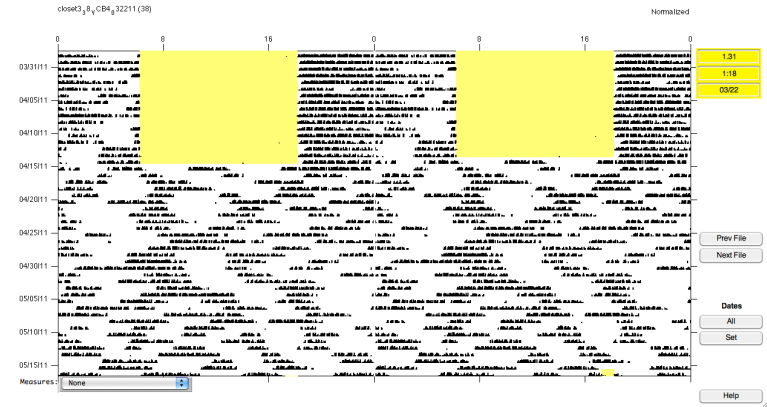

## V4-37 Vgat-Cre+ Clock(fl/fl) Npas2(m/m) female 7074

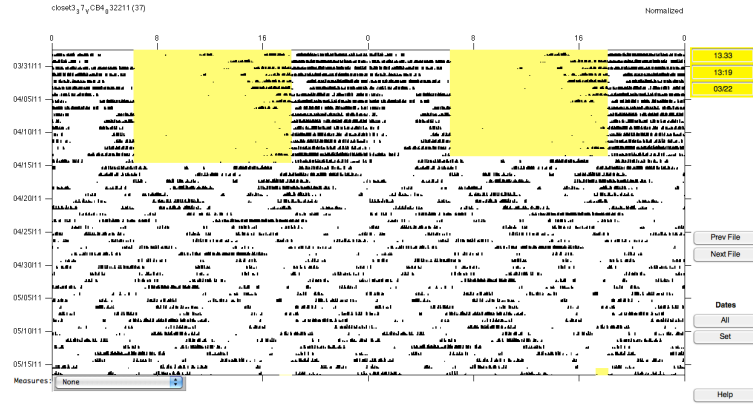

## V4-39 Vgat-Cre+ Clock(fl/fl) Npas2(m/m) female 7073

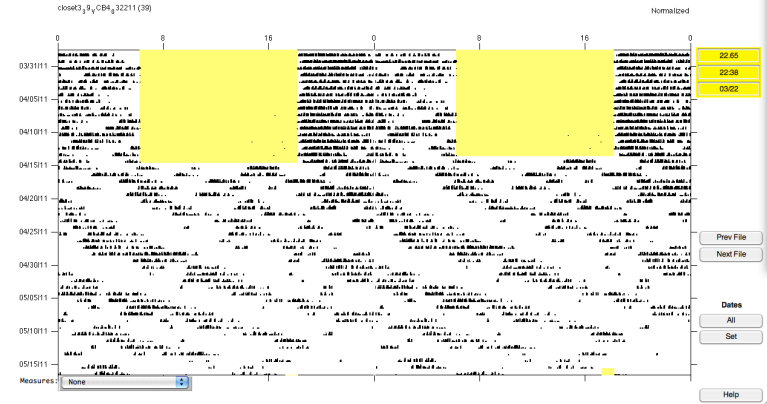



V4-43 Vgat-Cre+ Clock(fl/fl) Npas2(m/m) female 7075

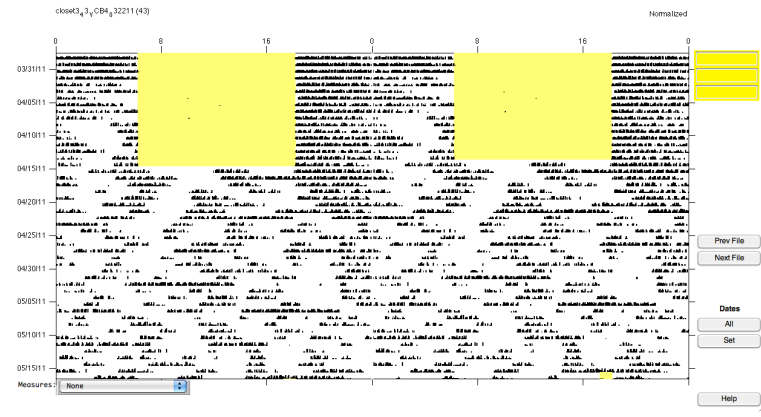

V4-55 NoCre Clock(fl/fl) Npas2(m/m) female 7211

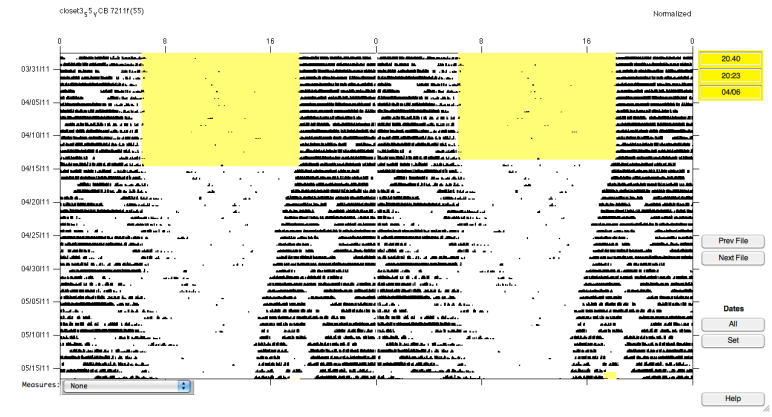

V4-54 NoCre Clock(fl/fl) Npas2(m/m) female 7212

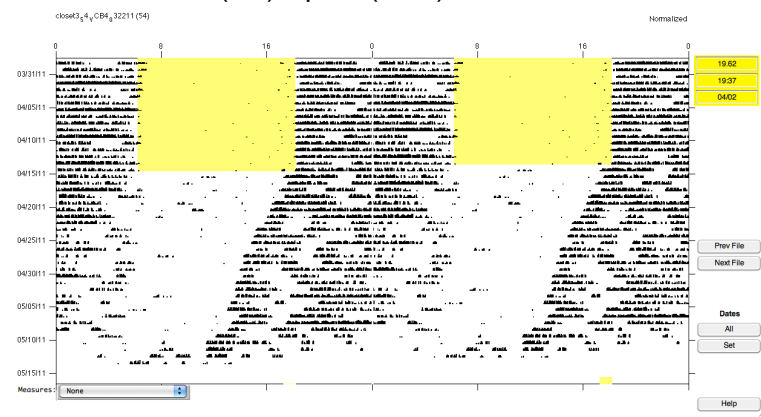

Experiment V5

V5-064 NoCre Clock(fl/fl) Npas2(m/m) male 7639

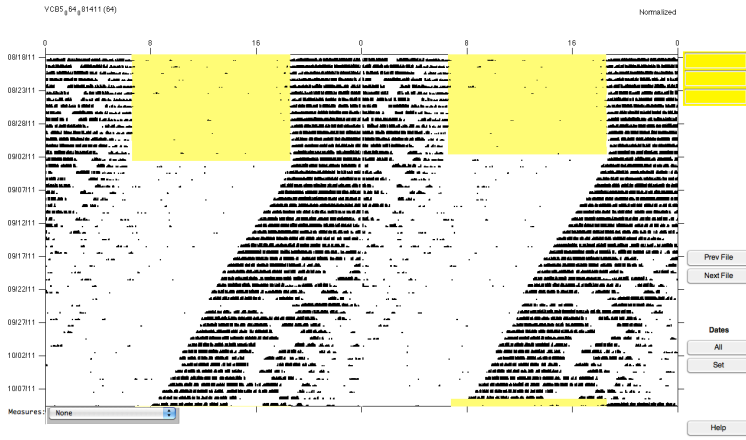

V5-066 VgatCre+ Clock(fl/fl) Npas2(+/+) male 7724 (odd)

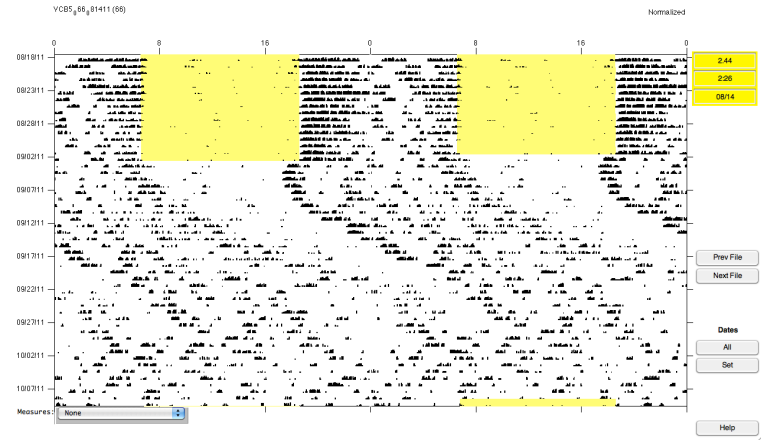

V5-065 VgatCre+ Clock(fl/fl) Npas2(m/m) male 7567

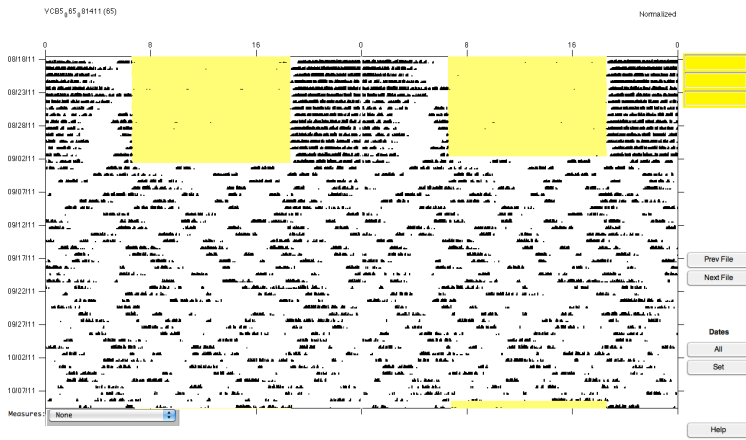

V5-069 VgatCre+ Clock(fl/fl) Npas2(+/+) female 7727a

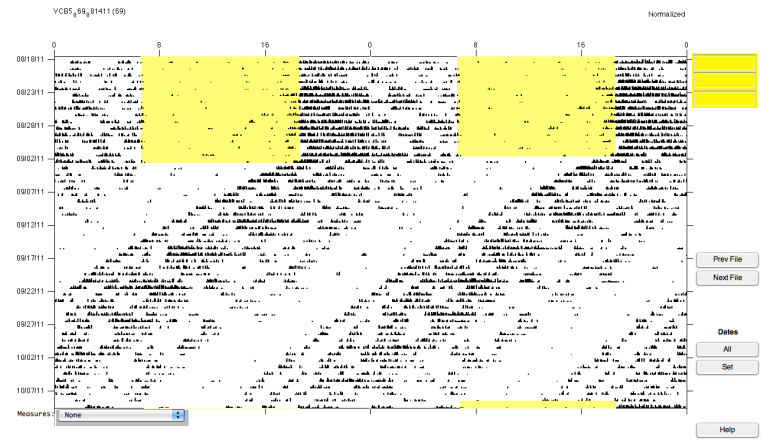

V5-071 VgatCre+ Clock(fl/fl) Npas2(+/+) female 7727b

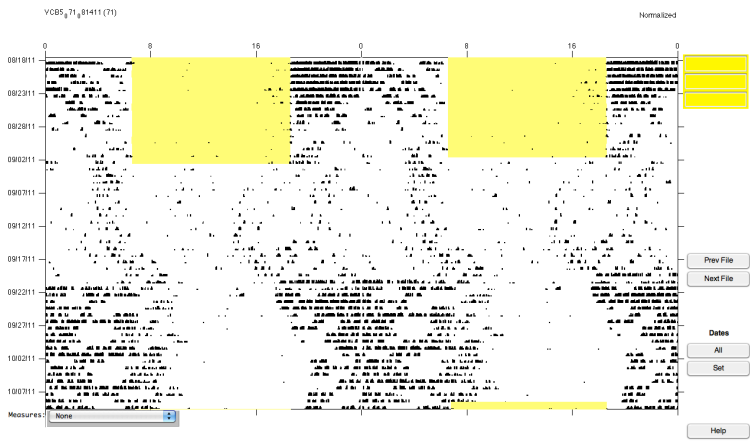

V5-074 VgatCre+ Clock(fl/fl) Npas2(m/m) female 7570a

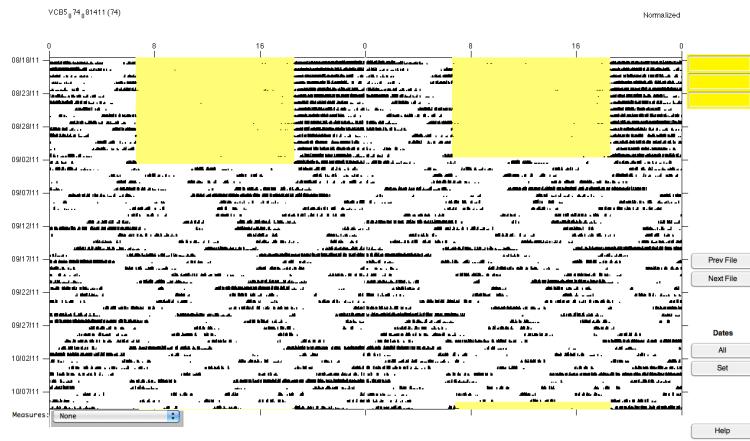

V5-073 NoCre Clock(fl/fl) Npas2(m/m) female 7569

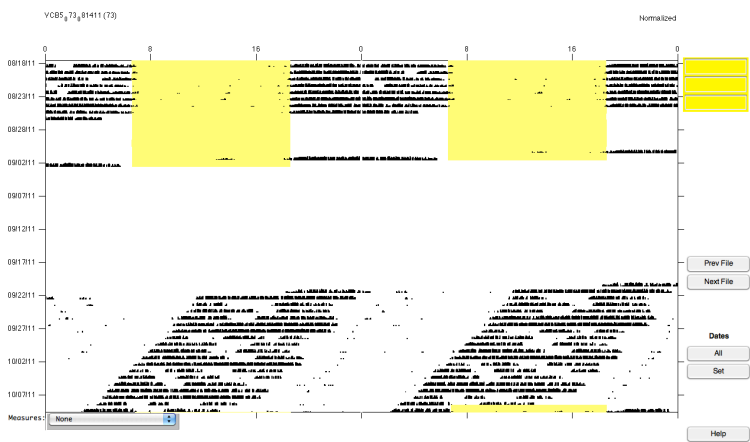

V5-075 VgatCre+ Clock(fl/fl) Npas2(m/m) female 7643

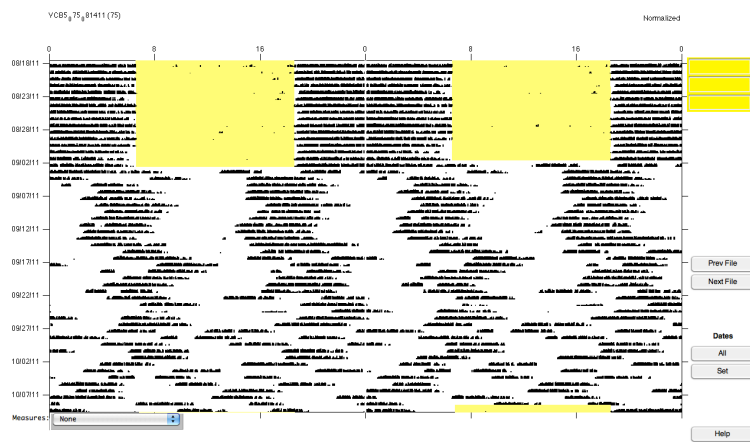

V5-076 VgatCre+ Clock(fl/fl) Npas2(m/m) female 7642

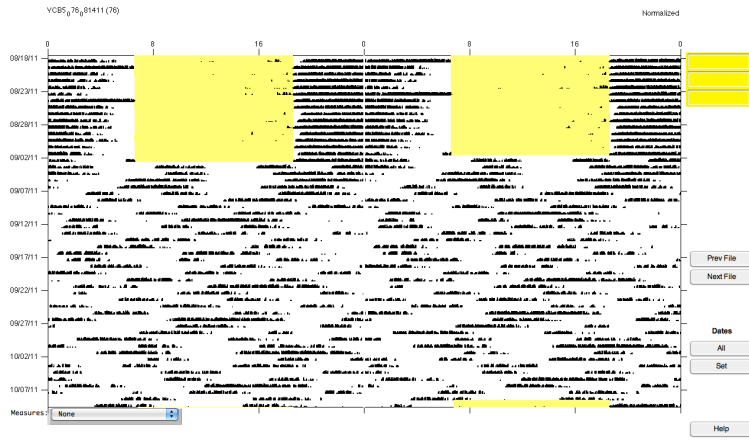

V5-078 NoCre Clock(fl/fl) Npas2(m/m) female 7640

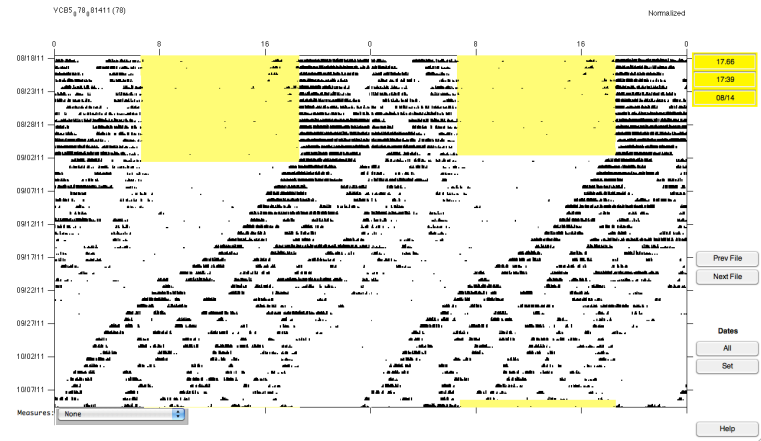

V5-077 NoCre Clock(fl/fl) Npas2(m/m) female 7641

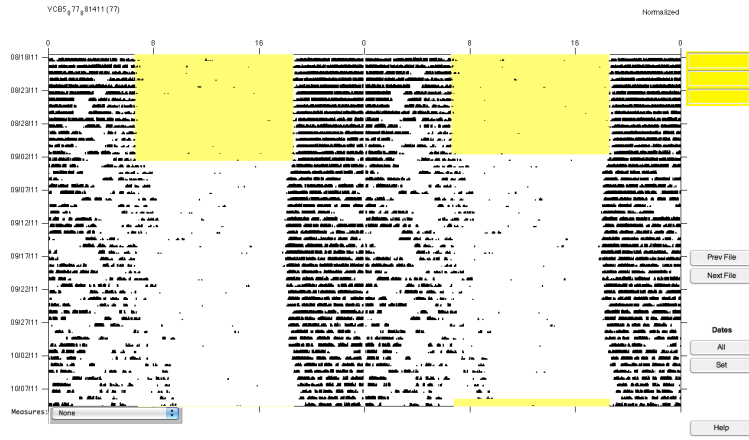

V5-079 NoCre Clock(fl/fl) Npas2(m/m) female 7570b

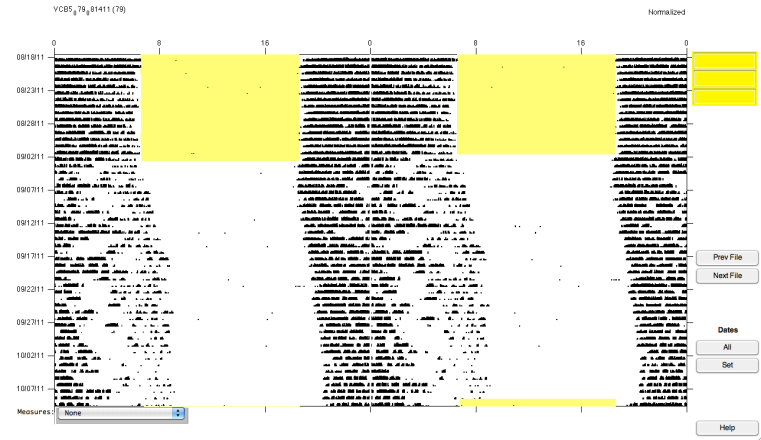

V5-109 NoCre Clock(fl/fl) Npas2(+/+) male 5588

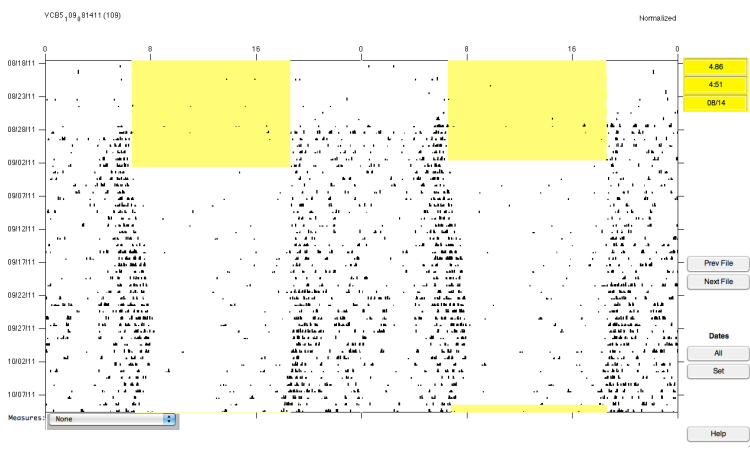

V5-111 NoCre Clock(fl/fl) Npas2(m/m) male 7565

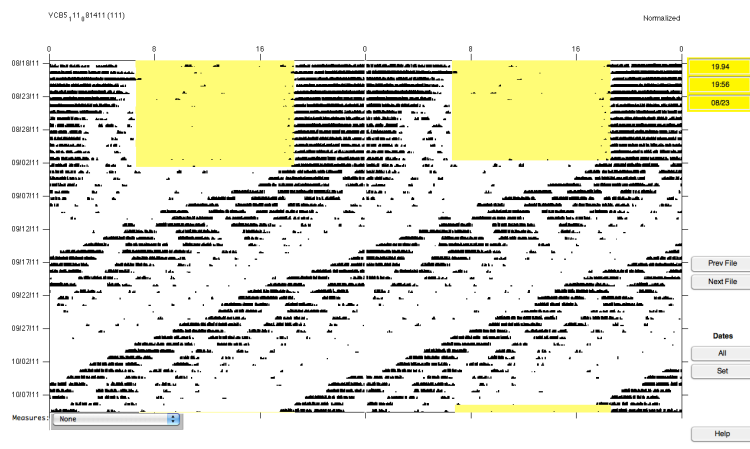

V5-110 Vgat-Cre+ Clock(fl/fl) Npas2(m/m) male 7568

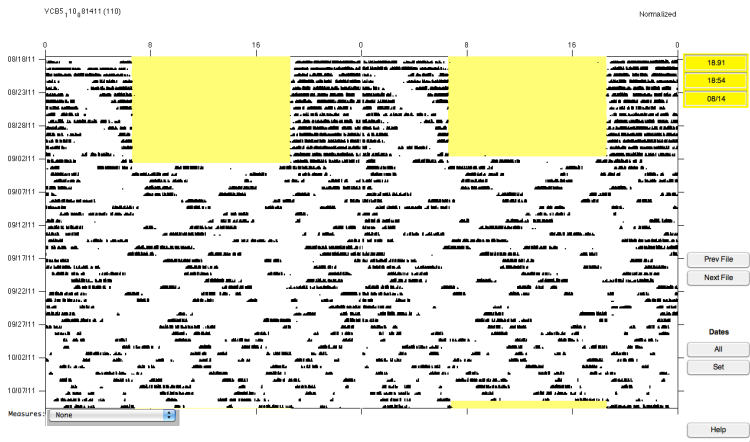

V5-112 NoCre Clock(fl/fl) Npas2(m/m) male 7566

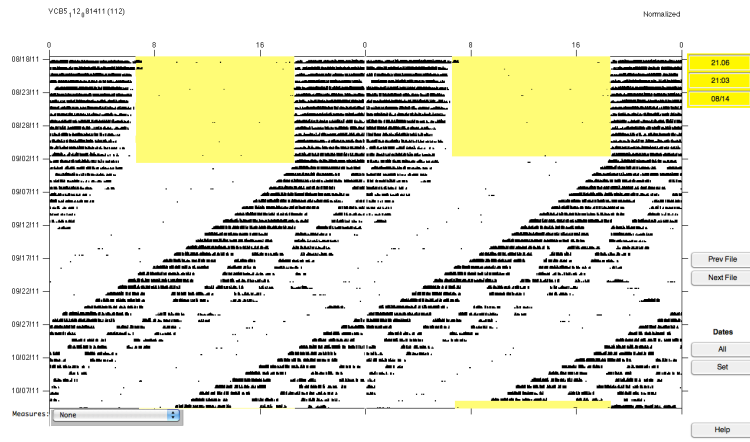

**Experiment V6.** Note 1-hr light pulses (yellow)

V6-008 Vgat-Cre+ male 7889 Clock(WT) Npas2(WT)

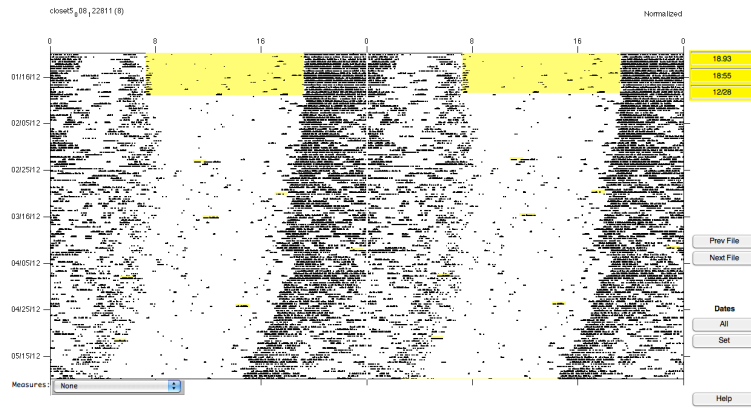

V6-011 Vgat-Cre+ male 8013 Clock(WT) Npas2(WT)

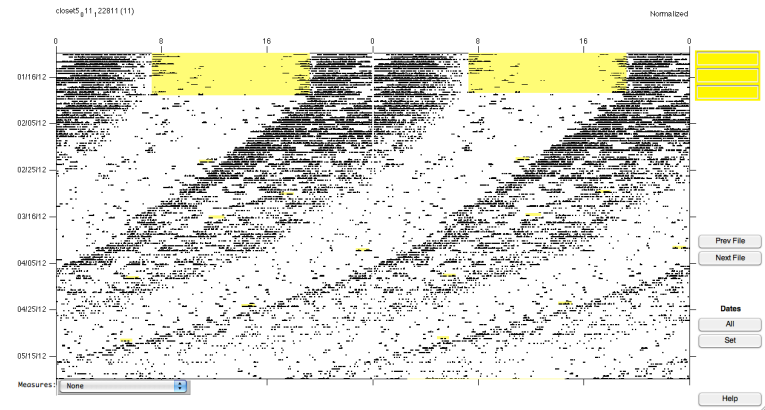

V6-009 Vgat-Cre+ male 7888 Clock(WT) Npas2(WT)

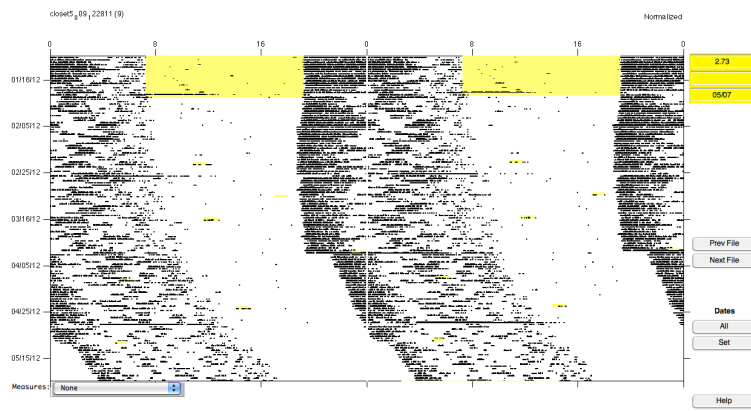

V6-087 Vgat-Cre+ Clock(fl/fl) Npas2(m/+) female 7451

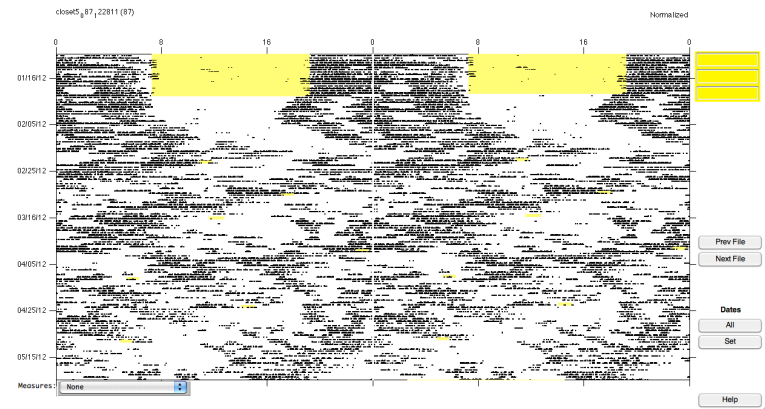

V6-088 NoCre Clock(fl/fl) Npas2(m/+) female 7909

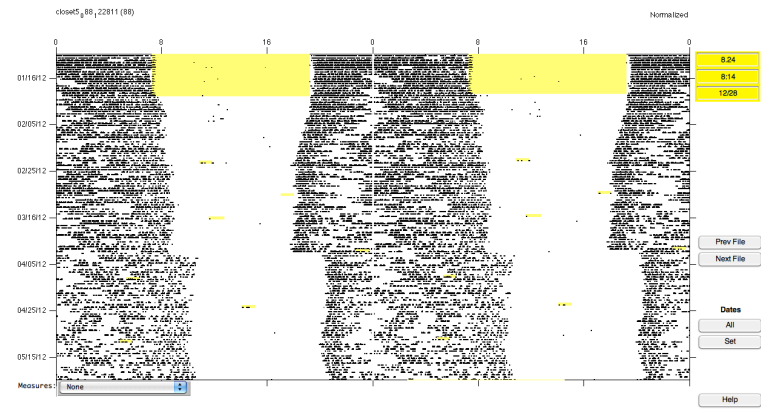

V6-090 NoCre Clock(fl/fl) Npas2(+/+) female 7907

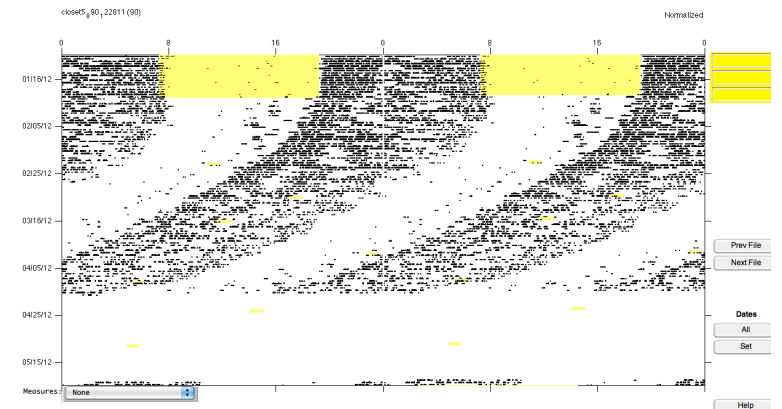

V6-089 NoCre Clock(fl/fl) Npas2(+/+) female 7908

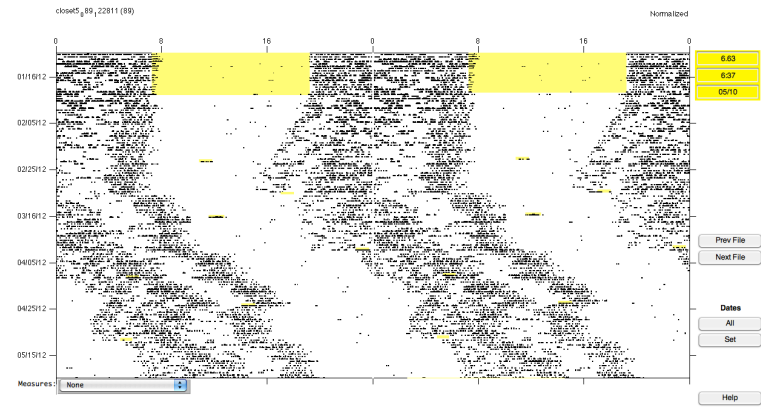

V6-091 Vgat-Cre+ Clock(fl/fl) Npas2(+/+) female 7452

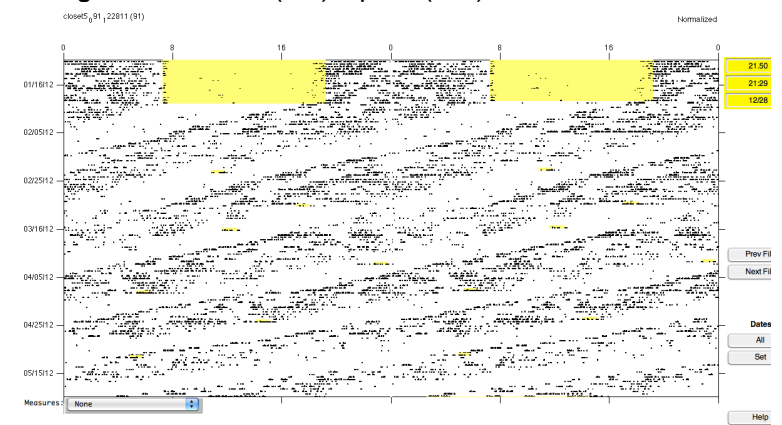

V6-093 Vgat-Cre+ Clock(fl/fl) Npas2(m/+) female 7905

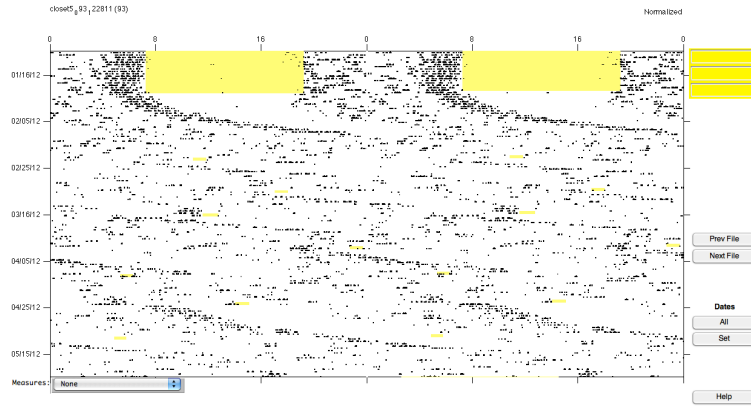

V6-095 Vgat-Cre+ Clock(fl/fl) Npas2(+/+) male 7833

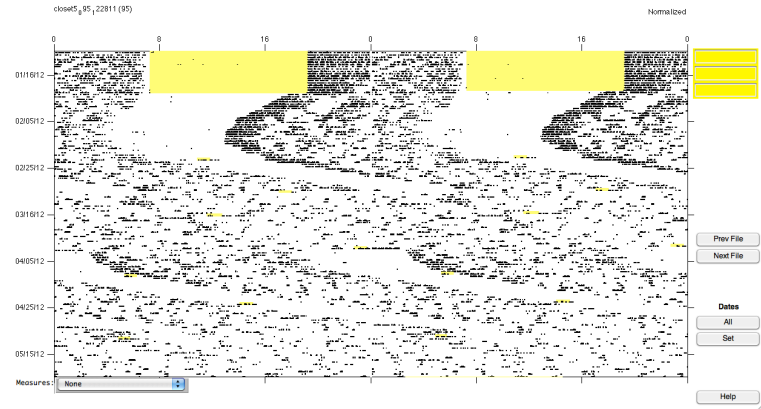

V6-094 Vgat-Cre+ Clock(fl/fl) Npas2(+/+) male 7606

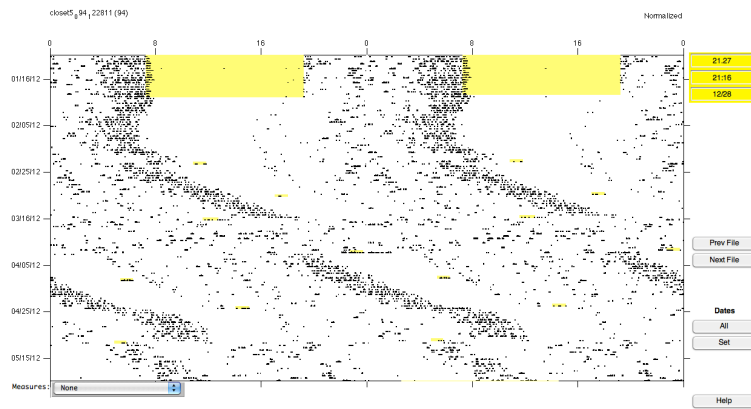

V6-096 Vgat-Cre+ Clock(fl/fl) Npas2(m/+) male 7834

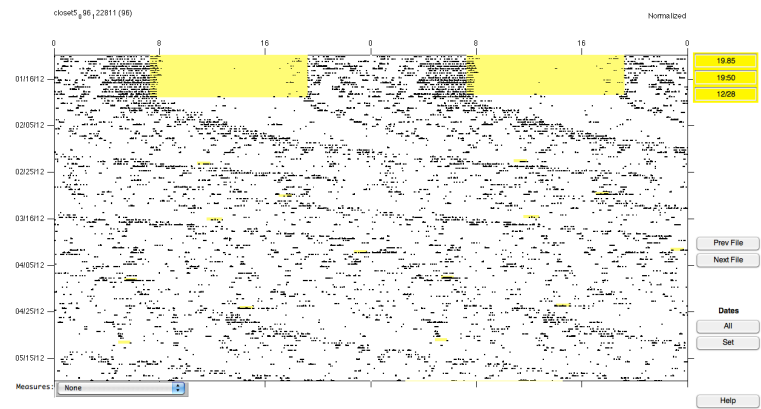

1  
2  
3  
4  
5  
6  
7  
8  
9  
10  
11  
12  
13  
14  
15  
16  
17  
18  
19  
20  
21  
22  
23  
24  
25  
26  
27  
28  
29  
30  
31  
32  
33  
34  
35  
36  
37  
38  
39  
40  
41  
42  
43  
44  
45  
46  
47



V6-097 Vgat-Cre+ Clock(fl/fl) Npas2(+/+) female 7837

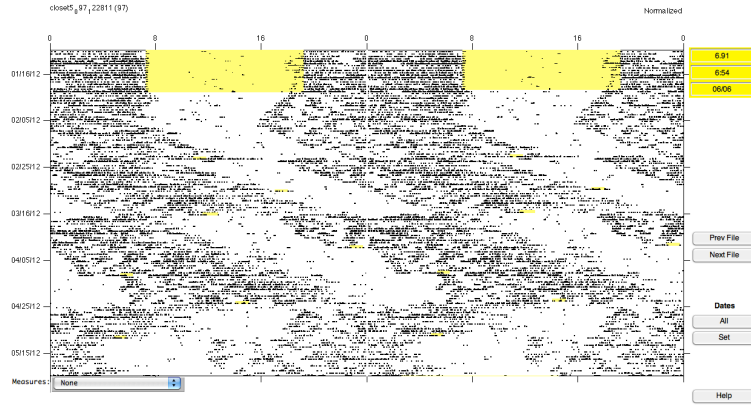

V6-099 Vgat-Cre+ Clock(fl/fl) Npas2(+/+) female 7839

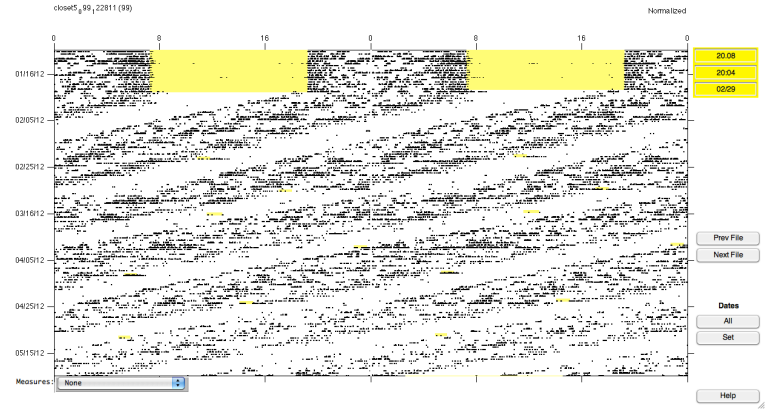

V6-098 Vgat-Cre+ Clock(fl/fl) Npas2(+/+) female 7838

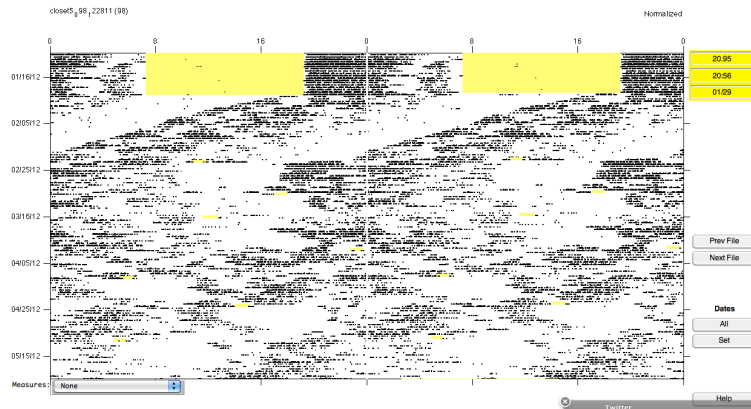

V6-100 Vgat-Cre+ Clock(fl/fl) Npas2(+/+) female 7840

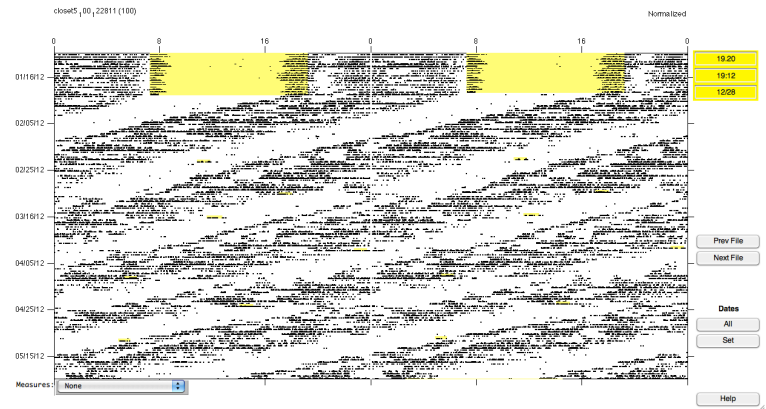

V6-101 Vgat-Cre+ male 8061 {Clock(WT) Npas2(WT)}

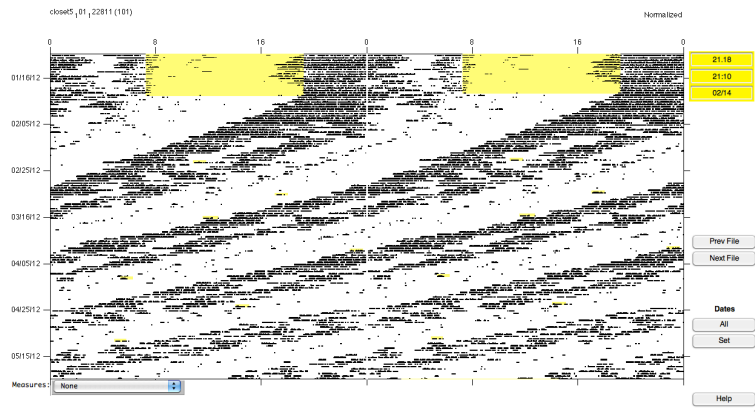

V6-103 Vgat-Cre+ male 8063 {Clock(WT) Npas2(WT)}

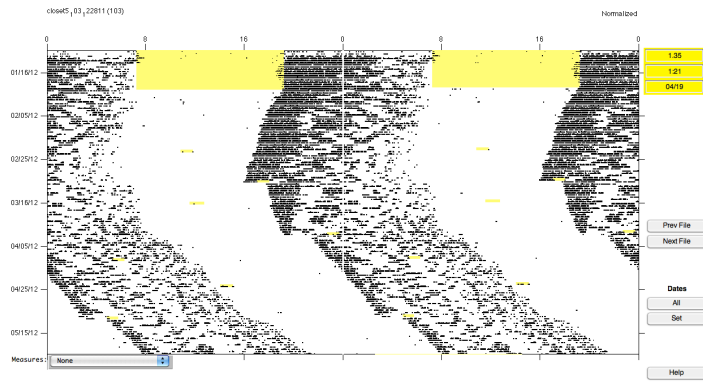

V6-104 Vgat-Cre+ male 8012 {Clock(WT) Npas2(WT)}

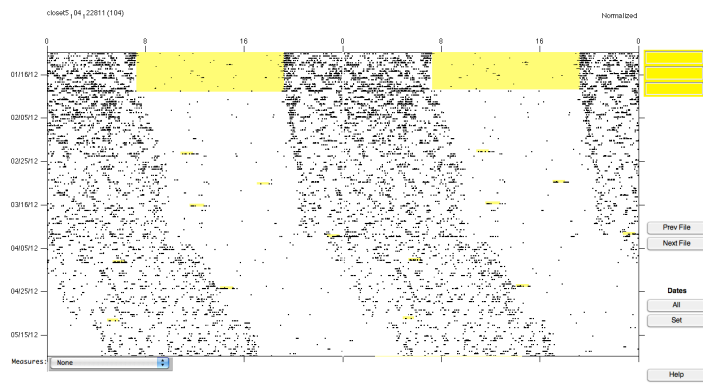

V6-102 Vgat-Cre+ male 8062 {Clock(WT) Npas2(WT)}

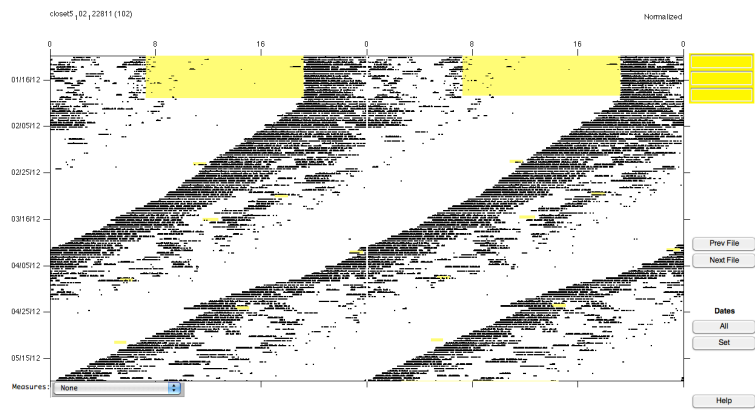

V6-105 Vgat-Cre+ female 8064 {Clock(WT) Npas2(WT)}

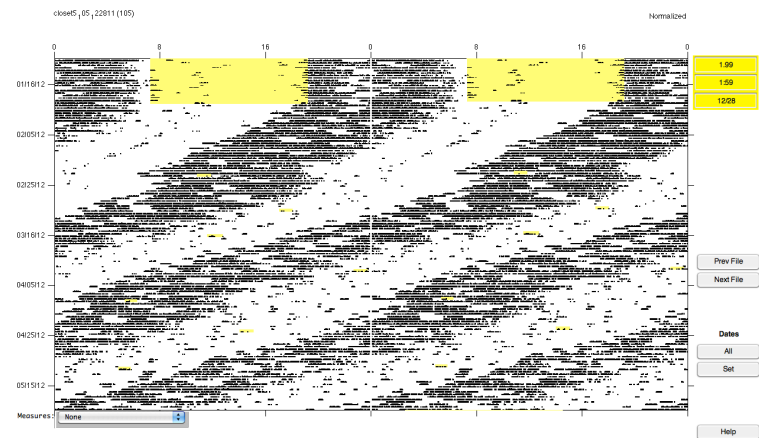

### Experiment V7

### V7-30 Vgat-Cre+ Clock(fl/fl) Npas2 (m/m) female 8157

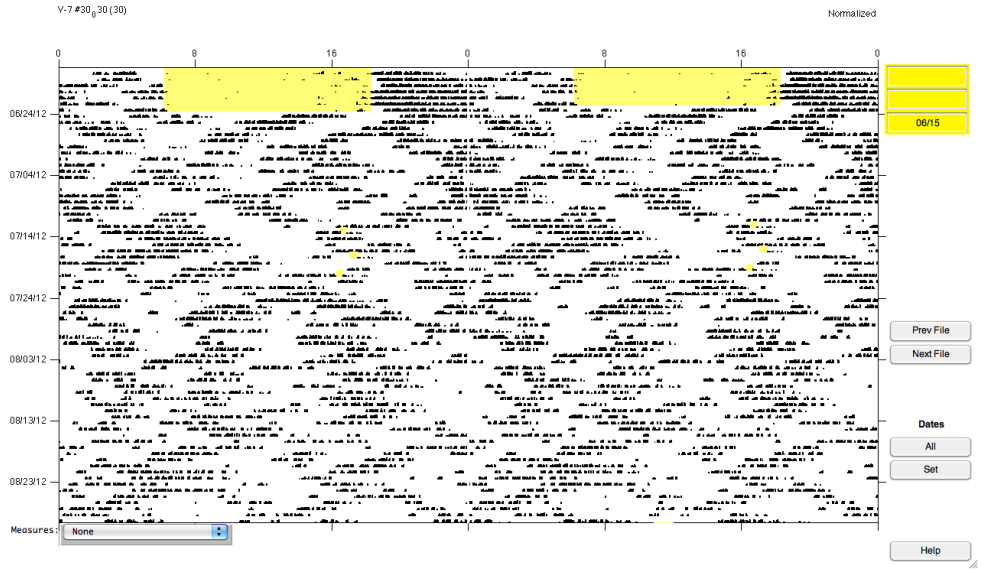

### V7-31 Vgat-Cre+ Clock(fl/fl) Npas2 (m/m) female 8158

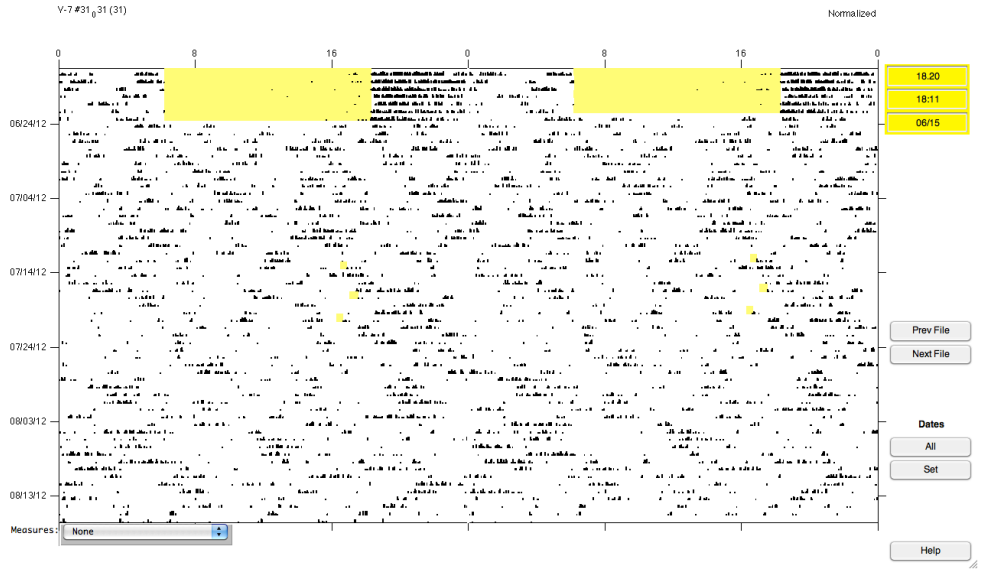

**Experiment V8.** Note 1-hr Light pulses

V8-087 Vgat-Cre+ male 8239 {Clock(+/+); Npas2 (+/+)}

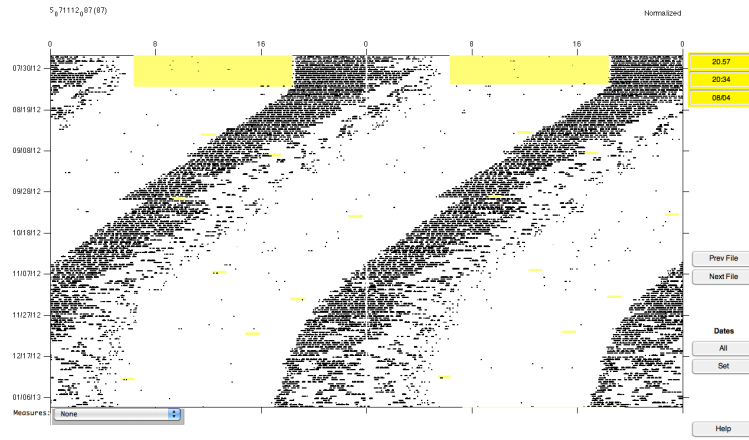

V8-089 Vgat-Cre+ female 8216 {Clock(+/+); Npas2 (+/+)}

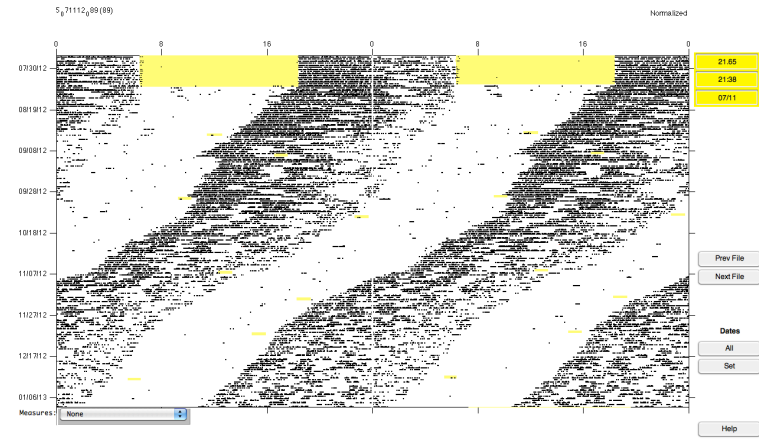

V8-088 Vgat-Cre+ male 8242 {Clock(+/+); Npas2 (+/+)}

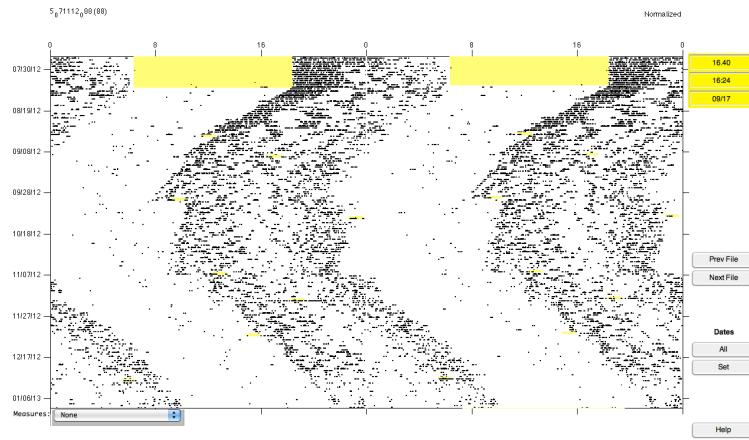

V8-090 Vgat-Cre+ male 8203 {Clock(+/+); Npas2 (+/+)}

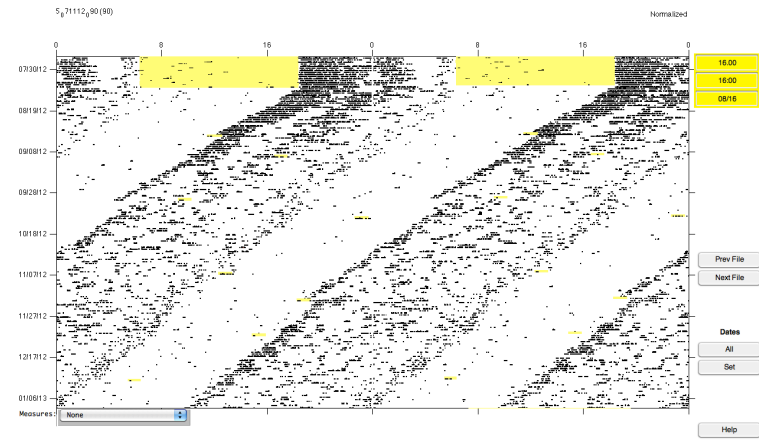

1  
2  
3  
4  
5  
6  
7  
8  
9  
10  
11  
12  
13  
14  
15  
16  
17  
18  
19  
20  
21  
22  
23  
24  
25  
26  
27  
28  
29  
30  
31  
32  
33  
34  
35  
36  
37  
38  
39  
40  
41  
42  
43  
44  
45  
46  
47

V8-091 Vgat-Cre+ female 8245 {Clock(+/+); Npas2 (+/+)}

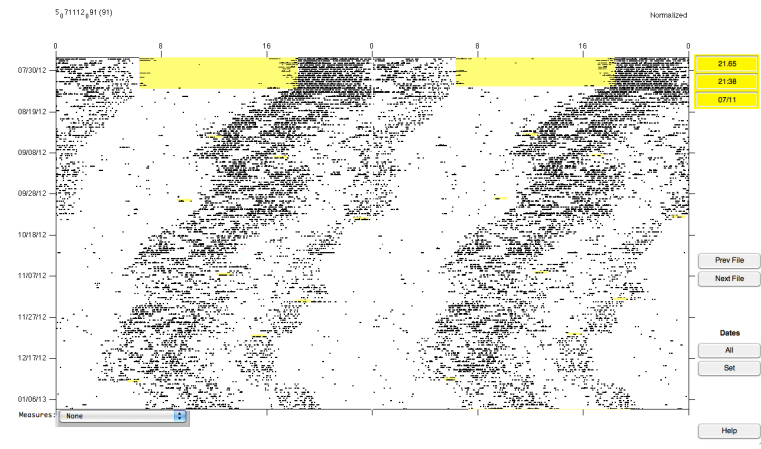

V8-093 Vgat-Cre+ male 8557 {Clock(+/+); Npas2 (+/+)}

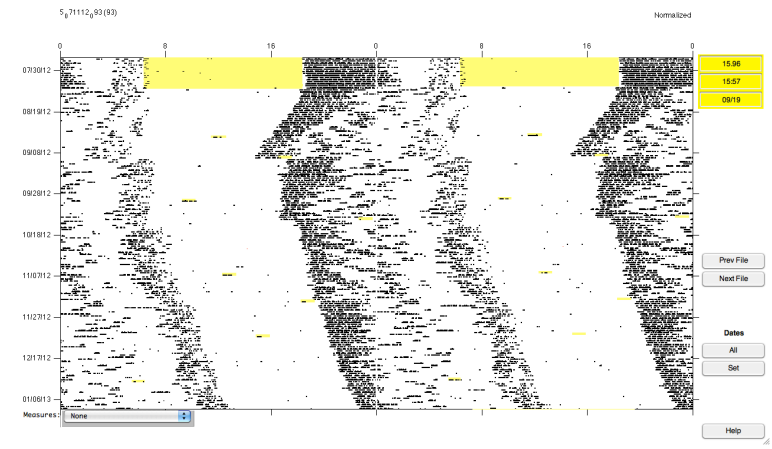

V8-092 Vgat-Cre+ female 8370 {Clock(+/+); Npas2 (+/+)}

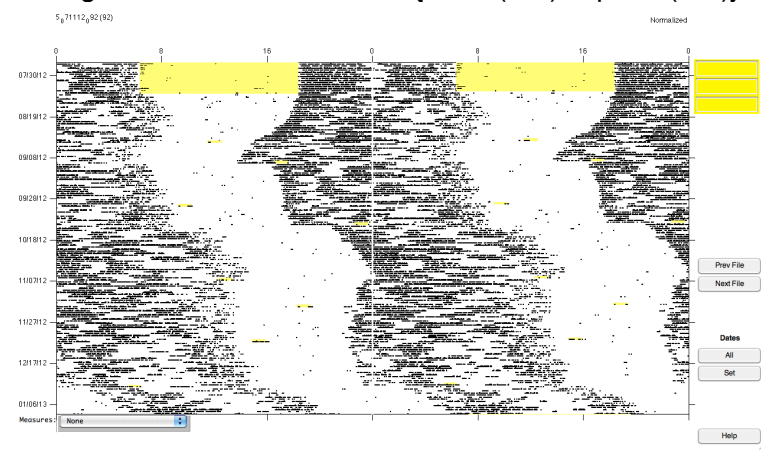

V8-094 Vgat-Cre+ male 8202 {Clock(+/+); Npas2 (+/+)}

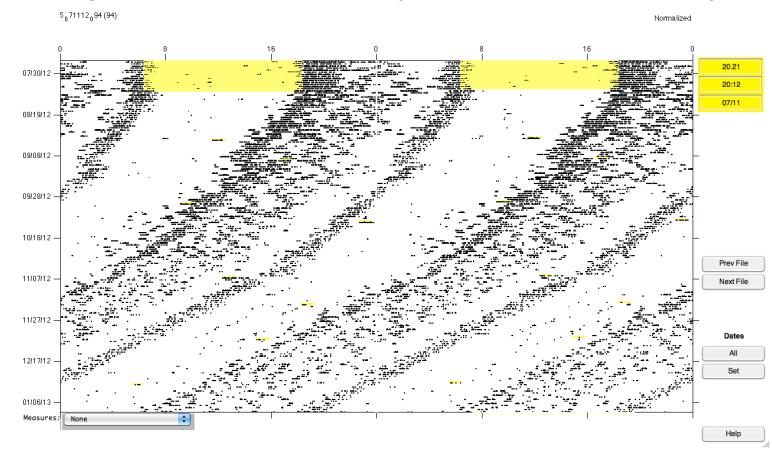

1  
2  
3  
4  
5 V8-098 Vgat-Cre+ male 8193 {Clock(+/+); Npas2 (+/+)}  
6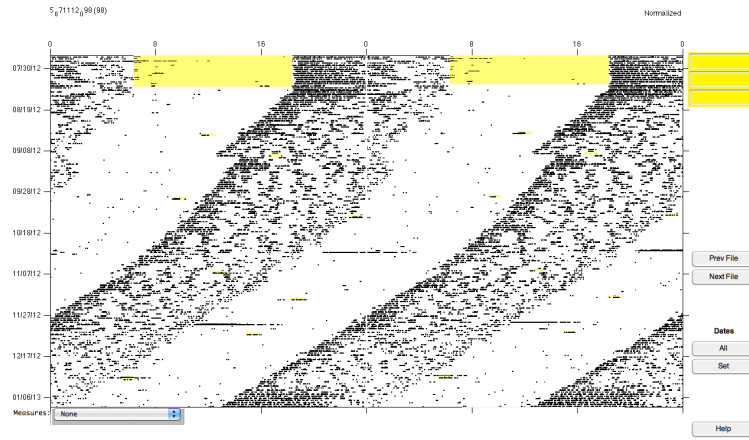

V8-102 Vgat-Cre+ male 8194 {Clock(+/+); Npas2 (+/+)}

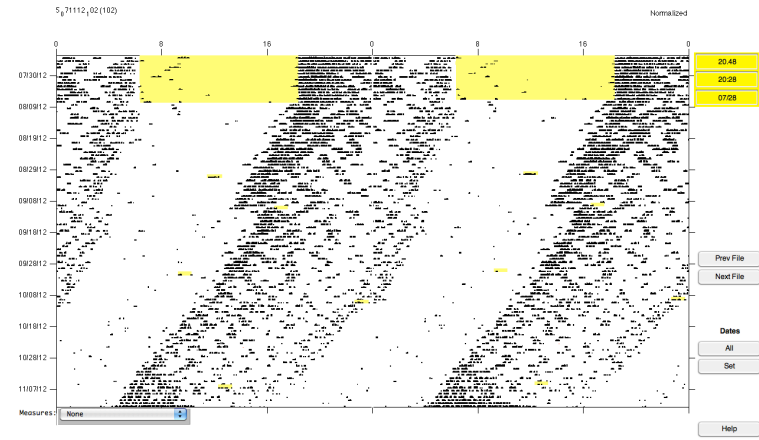

**Experiment V9.** Animals from LD to 1L:10D:1L:12D then DD

V9-086 Vgat-Cre+ Clock(fl/fl) Npas2(m/m) male 3178

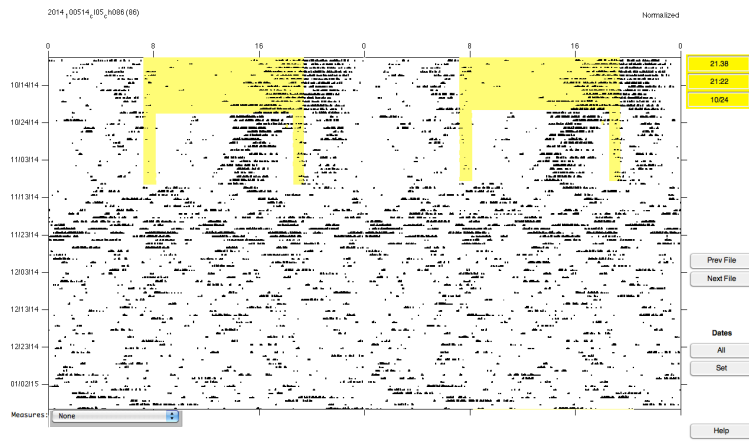

V9-088 NoCre Clock(fl/fl) Npas2(m/m) male 3180

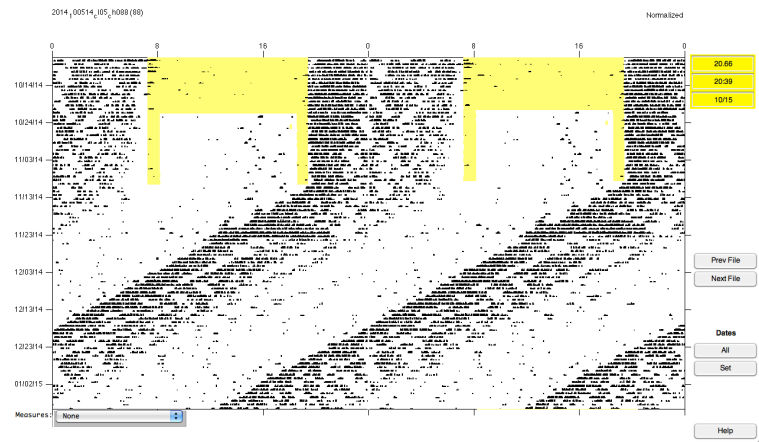

V9-087 Vgat-Cre+ Clock(fl/fl) Npas2(m/m) male 3179

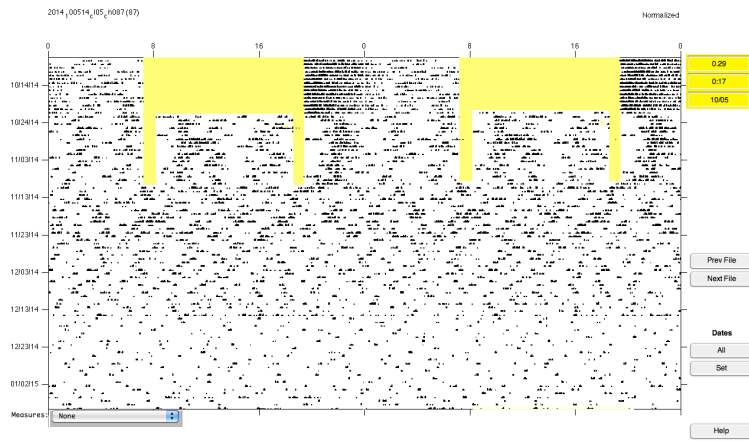

V9-089 Vgat-Cre+ Clock(fl/fl) Npas2(m/m) male 3213

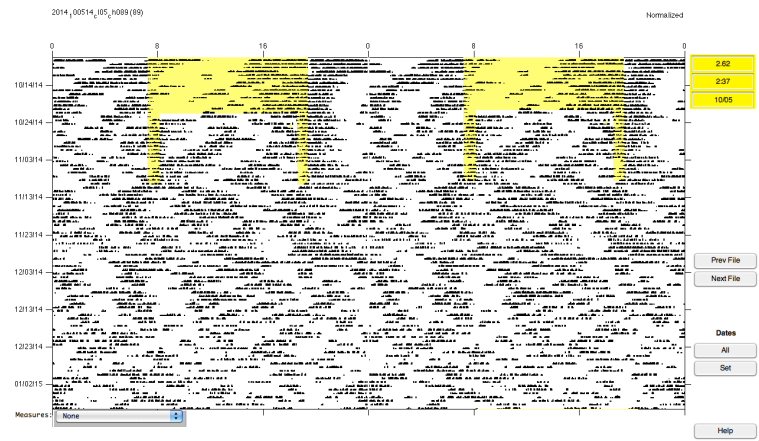

## V9-090 Vgat-Cre+ Clock(fl/fl) Npas2(m/m) female 2245

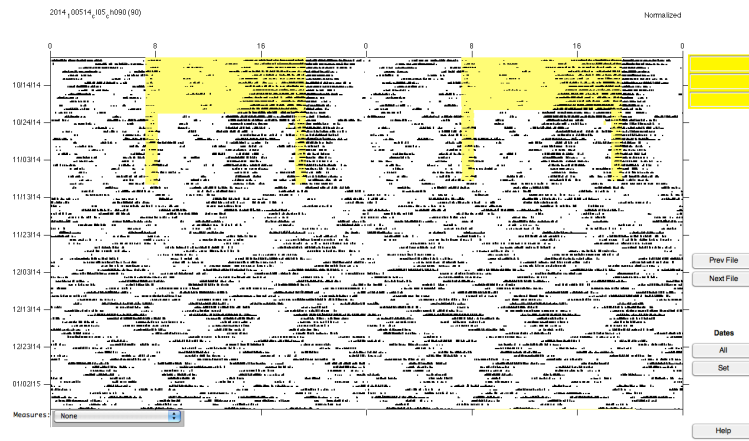

## V9-091 NoCre Clock(fl/fl) Npas2(m/m) female 3217

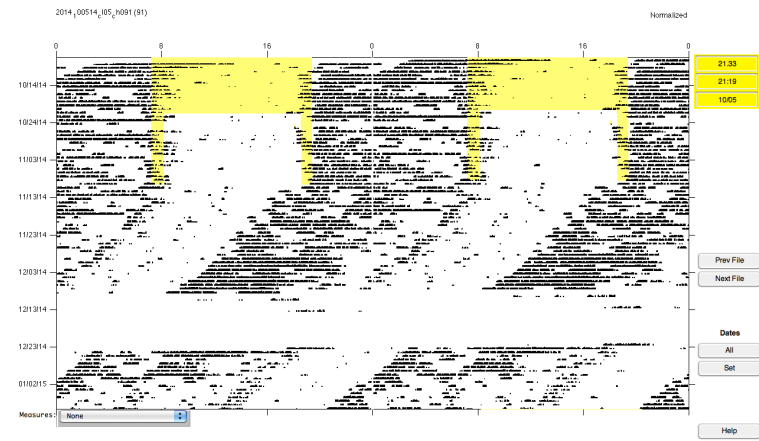



**Experiment V10**

V10-36 Vgat-Cre+ Bmal1(+/-) m 2650

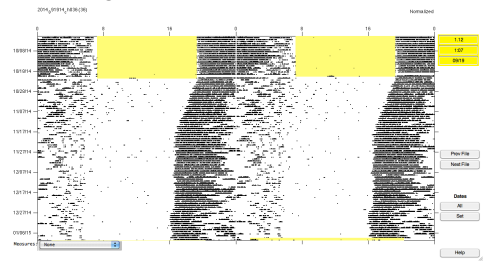

V10-40 Vgat-Cre+ Bmal1(fl/fl) m 3188

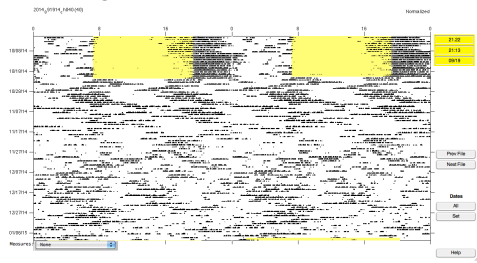

V10-44 Vgat-Cre+ Bmal1(fl/fl) m 3129

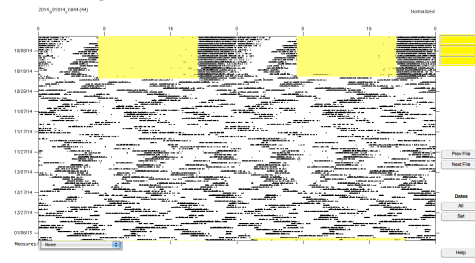

V10-37 No Cre Bmal1(fl/fl) m 2649

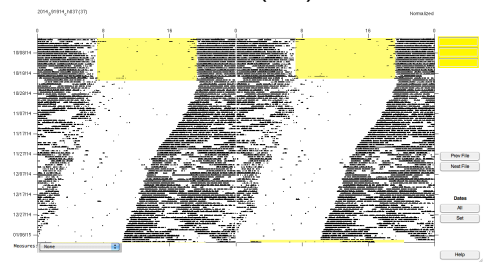

V10-41 No Cre Bmal1(fl/fl) m 2781

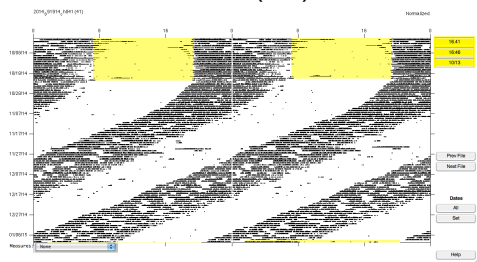

V10-45 Vgat-Cre+ Bmal1(+/-) m 2814

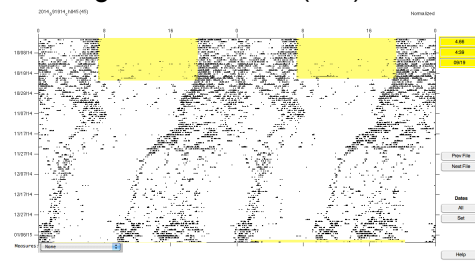

V10-38 Vgat-Cre+ Bmal1(fl/fl) m 3191

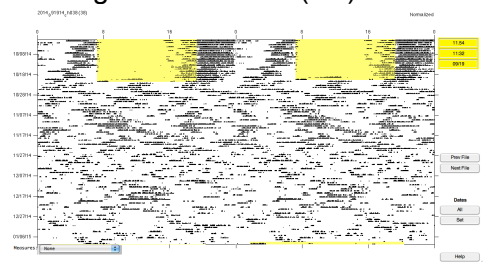

V10-42 No Cre Bmal1(fl/fl) m 2783

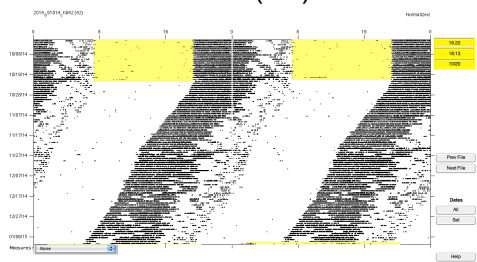

V10-50 No Cre Bmal1(fl/fl) m 3476

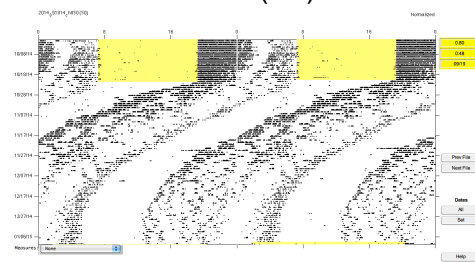

V10-39 No Cre Bmal1(fl/fl) m 3190

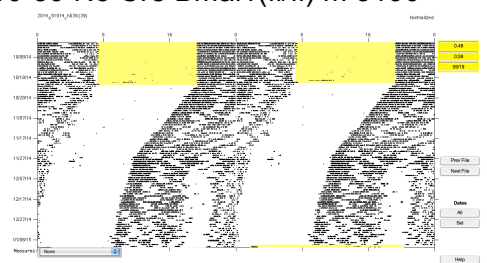

V10-43 Vgat-Cre+ Bmal1(fl/fl) m 3131

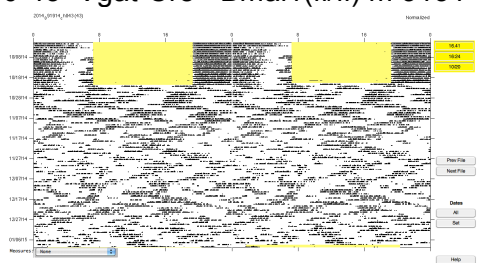

V10-51 Vgat-Cre+ Bmal1(fl/fl) m 3478

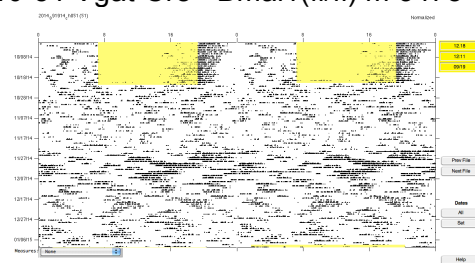

## Experiment V10

V10-52 No Cre Bmal1(fl/fl) m 3472

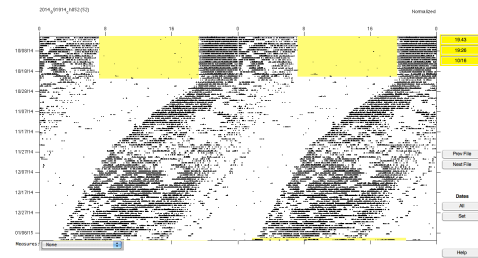

V10-56 Vgat-Cre+ Bmal1(+/+) f 2659

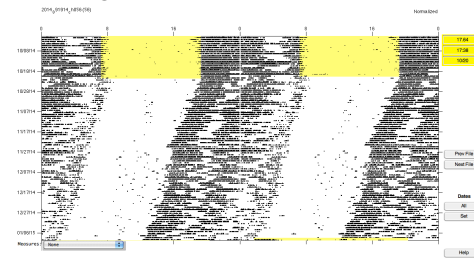

V10-60 No Cre Bmal1(fl/fl) f 2792

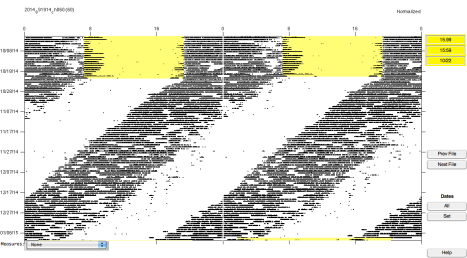

V10-53 Vgat-Cre+ Bmal1(fl/fl) m 3471

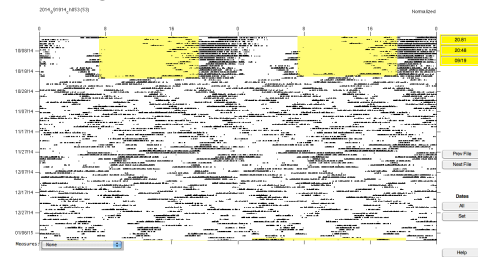

V10-57 Vgat-Cre+ Bmal1(+/+) f 2652

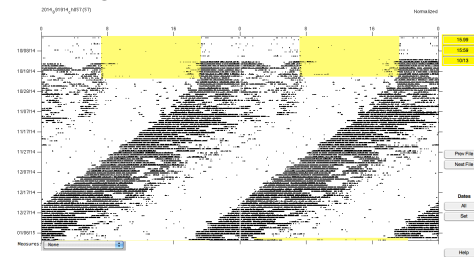

V10-61 No Cre Bmal1(fl/fl) f 2647

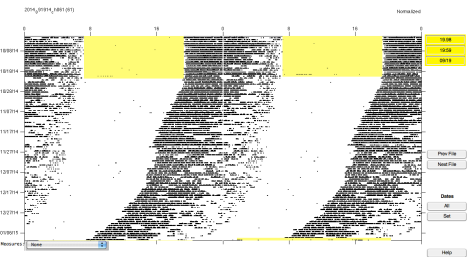

V10-54 Vgat-Cre+ Bmal1(fl/fl) m 3475

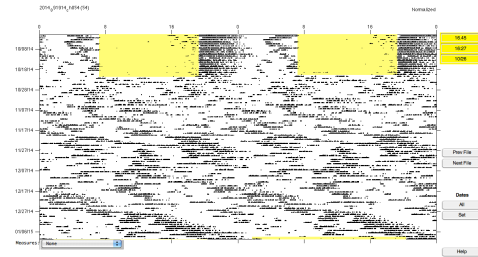

V10-58 Vgat-Cre+ Bmal1(+/+) f 2820

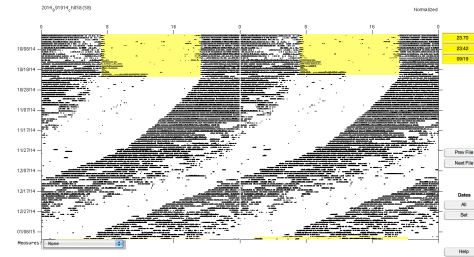

V10-62 No Cre Bmal1(fl/fl) f 3194

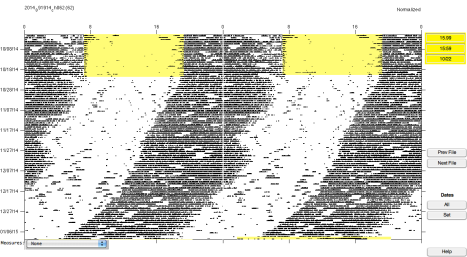

V10-55 Vgat-Cre+ Bmal1(fl/fl) m 3477

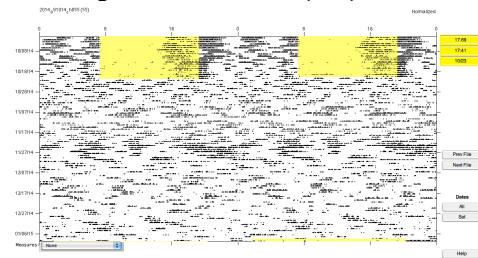

V10-59 No Cre Bmal1(fl/fl) f 3133

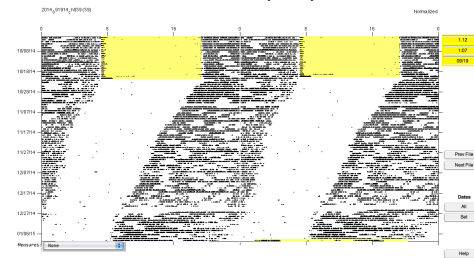

V10-63 Vgat-Cre+ Bmal1(fl/fl) f 3474

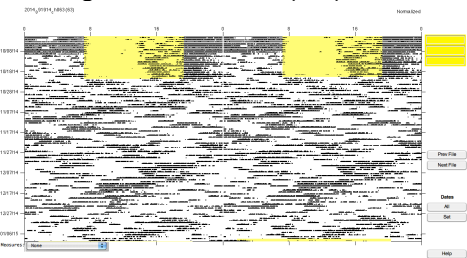

1  
2  
3  
4  
5  
6  
7  
8  
9  
10  
11  
12  
13  
14  
15  
16  
17  
18  
19  
20  
21  
22  
23  
24  
25  
26  
27  
28  
29  
30  
31  
32  
33  
34  
35  
36  
37  
38  
39  
40  
41  
42  
43  
44  
45  
46  
47  
48  
49  
50  
51  
52  
53  
54  
55  
56  
57  
58  
59  
60

Figure S2

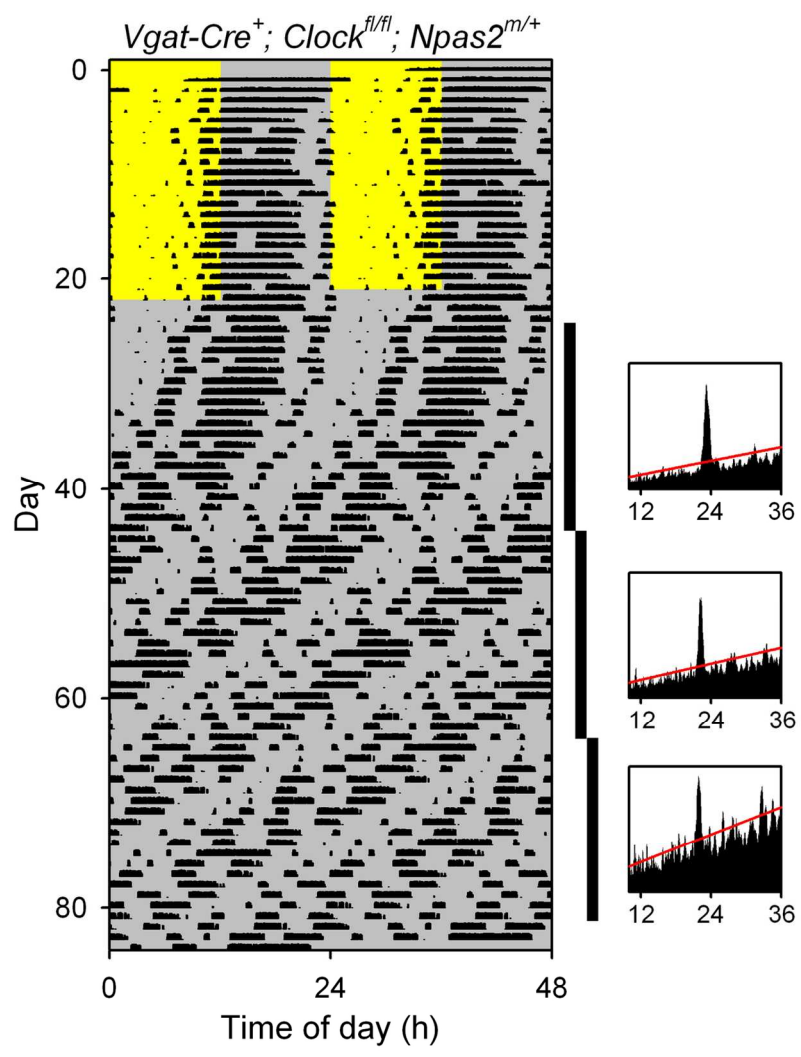

117x163mm (300 x 300 DPI)

Figure S3

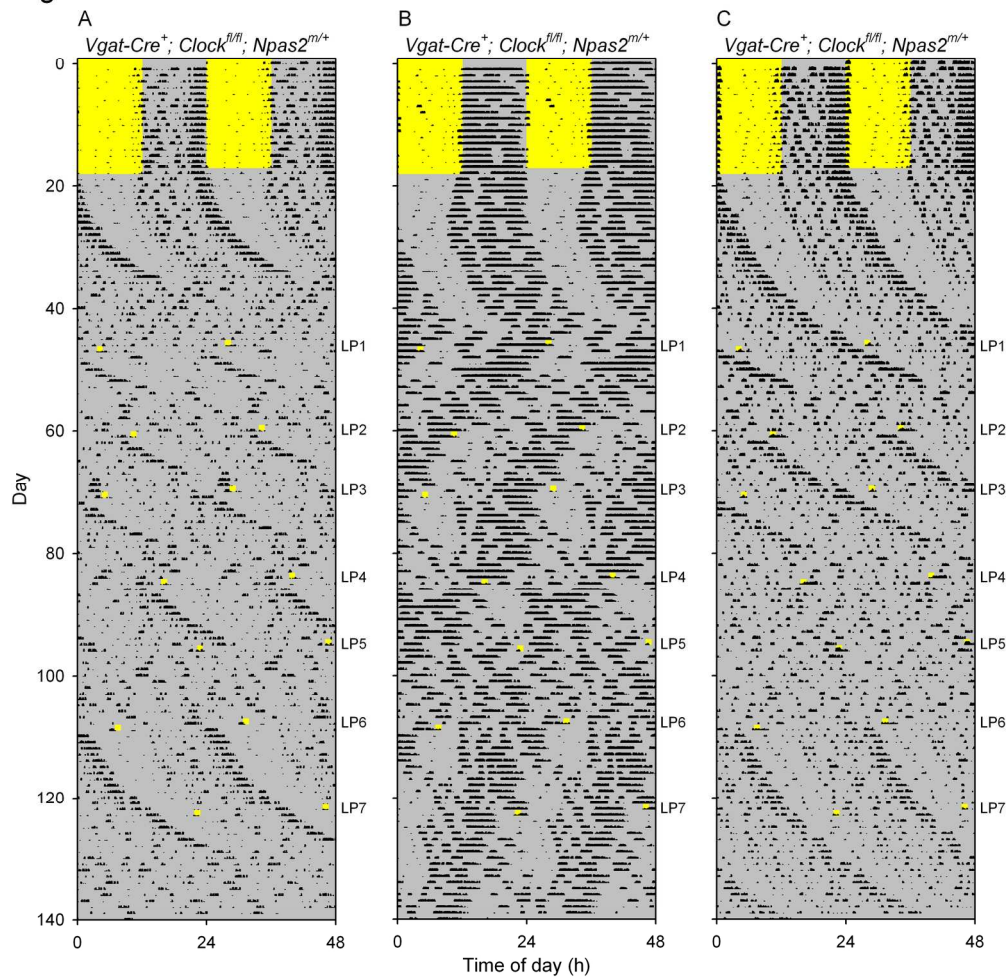

177x187mm (300 x 300 DPI)

Figure S4

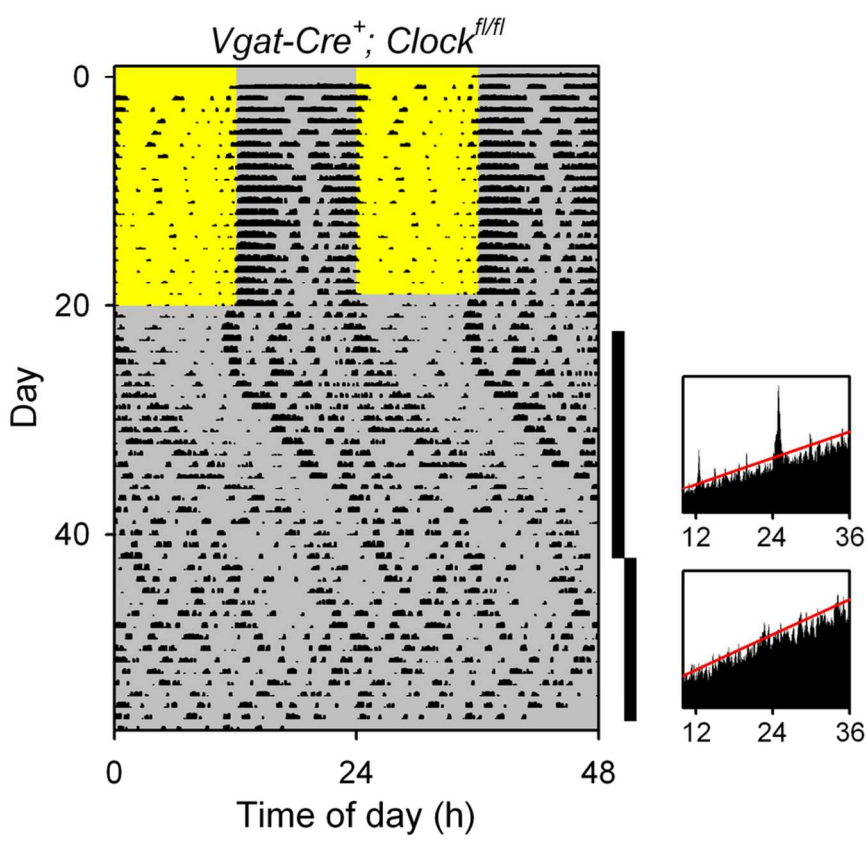

91x94mm (300 x 300 DPI)
